# Supplementary material for: A highly enantioselective Michael reaction between α,β-unsaturated ketones and malonic acid half-thioesters
Source: Royal Society of Chemistry journal article supplement (doi:10.1039/c5nj00719d), 2015-01-01
Supplement: c5nj00719d1.pdf [file c5nj00719d1.pdf]

## Highly Enantioselective Michael Reaction between $\alpha,\beta$ -Unsaturated Ketone and Malonic Acid Half-thioester

Qiao Ren, Tao Gao, Wenjun Li, Li Wan, Yimin Hu, Yanhong Peng, Shaofa Sun,

Minghu Wu, Haibing Guo, and Jian Wang

Hubei Collaborative Innovation Centre for Non-power Nuclear Technology, College  
of Chemistry and Biological Sciences, Hubei University of Science and Technology,  
Hubei Province 437100, People's Republic China

Department of Chemistry, National University of Singapore, 3 Science Drive 3,  
Singapore 117543, wangjian1999@hotmail.com

### Supporting Information

#### Contents:

|                                                                           |     |
|---------------------------------------------------------------------------|-----|
| 1. General Information                                                    | S2  |
| 2. Experimental Procedure for Decarboxylative Reaction of MAHTs to Enones | S3  |
| 3. HPLC Chromatogram Profile and NMR Spectra of the Products              | S11 |

## 1. General Information

Chemicals and solvents were purchased from commercial suppliers and used as received.  $^1\text{H}$  and  $^{13}\text{C}$  NMR spectra were recorded on a Bruker ACF300 (300 MHz) or AMX500 (500 MHz) spectrometer. Chemical shifts were reported in parts per million (ppm), and the residual solvent peak was used as an internal reference: proton (chloroform  $\delta$  7.26), carbon (chloroform  $\delta$  77.0) or tetramethylsilane (TMS  $\delta$  0.00) was used as a reference. Multiplicity was indicated as follows: s (singlet), d (doublet), t (triplet), q (quartet), m (multiplet), dd (doublet of doublet), bs (broad singlet). Coupling constants were reported in Hertz (Hz). Low resolution mass spectra were obtained on a Finnigan/MAT LCQ spectrometer in ESI mode, and a Finnigan/MAT 95XL-T mass spectrometer in EI mode. All high resolution mass spectra were obtained on a Finnigan/MAT 95XL-T spectrometer. For thin layer chromatography (TLC), Merck pre-coated TLC plates (Merck 60 F254) were used, and compounds were visualized with a UV light at 254 nm. Flash chromatography separations were performed on Merck 60 (0.040-0.063 mm) mesh silica gel. The enantiomeric excesses of products were determined by chiral phase HPLC analysis. Optical rotations were recorded on Jasco DIP-1000 polarimeter.

## 2. Experimental Procedure for Decarboxylative Reaction of MAHTs to Enones

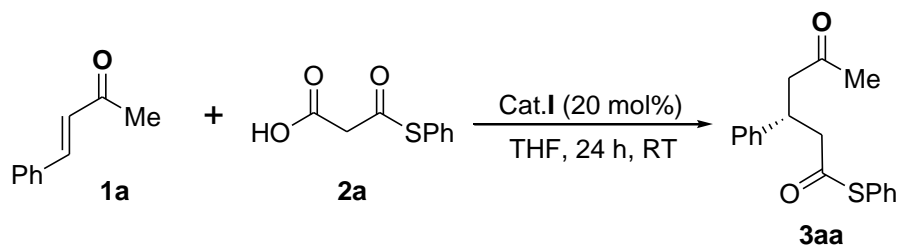

Typical procedure for the cascade reaction:

To a solution of *trans*-4-Phenyl-3-buten-2-one **1a** (29.2 mg, 0.2 mmol,) and catalyst **I** (12.9 mg, 0.04 mmol) in THF (1.0 mL) at room temperature, was added malonic acid half thioester **2a** (98.1 mg, 0.50 mmol) in one portion. The reaction mixture was kept stirring at room temperature for 24 h. The crude product was purified by silica gel flash chromatography, eluted by hexane/EtOAc = 10:1 to afford the desired product **3aa** as colorless oil (48.3 mg, 81% yield).

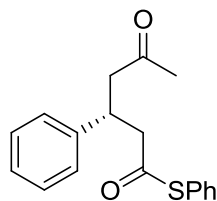

**(R)-S-phenyl 5-oxo-3-phenylhexanethioate (3aa)** (Table 2, entry 1). 48.3 mg, 81% yield; Colorless oil;  $^1\text{H NMR}$  (500 MHz,  $\text{CDCl}_3$ )  $\delta$  (ppm): 7.40 – 7.36 (m, 3H), 7.33 – 7.29 (m, 4H), 7.24 – 7.21 (m, 3H), 3.77 (p,  $J = 7.2$  Hz, 1H), 3.04 – 2.81 (m, 4H), 2.06 (s, 3H);  $^{13}\text{C NMR}$  (125 MHz,  $\text{CDCl}_3$ )  $\delta$  (ppm): 206.53, 195.84, 142.40, 134.37, 129.37, 129.12, 128.65, 127.49, 127.36, 126.96, 49.36, 48.90, 37.81, 30.34; HRMS (ESI) calcd for  $\text{C}_{18}\text{H}_{18}\text{O}_2\text{SNa}^+$  [ $\text{M} + \text{Na}^+$ ] 321.0920, found 321.0929; HPLC (Chiralpak IC, *i*-propanol/hexane = 20/80, flow rate 1.0 mL/min,  $\lambda = 254$  nm):  $t_{\text{R}}$  (major) = 15.6 min,  $t_{\text{R}}$  (minor) = 20.5 min,  $ee = 97\%$ ;  $[\alpha]_{\text{D}}^{25} = -74.2$  ( $c = 1.01$  in DCM).

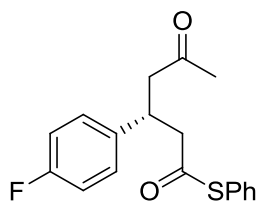

**(R)-S-phenyl 3-(4-fluorophenyl)-5-oxohexanethioate (3ba)** (Table 2, entry 2). 48.1 mg, 76% yield;

Colorless oil;  $^1\text{H NMR}$  (500 MHz,  $\text{CDCl}_3$ )  $\delta$  (ppm): 7.42 – 7.36 (m, 3H), 7.33 – 7.27 (m, 2H), 7.23 –

7.17 (m, 2H), 6.99 (t,  $J = 8.6$  Hz, 2H), 3.76 (p,  $J = 7.2$  Hz, 1H), 3.02 – 2.78 (m, 4H), 2.06 (s, 3H);  $^{13}\text{C}$

NMR (125 MHz,  $\text{CDCl}_3$ )  $\delta$  (ppm): 206.25, 195.70, 162.66, 160.72, 138.12, 138.10, 134.34, 129.45,

129.17, 128.96, 128.90, 127.36, 115.54, 115.38, 49.34, 48.96, 37.04, 30.35; HRMS (ESI) calcd for

$\text{C}_{18}\text{H}_{17}\text{O}_2\text{FSNa}^+$  [ $\text{M} + \text{Na}^+$ ] 339.0825, found 339.0831; HPLC (Chiralpak IC, *i*-propanol/hexane =

20/80, flow rate 1.0 mL/min,  $\lambda = 254$  nm):  $t_{\text{R}}$  (major) = 9.9 min,  $t_{\text{R}}$  (minor) = 14.5 min,  $ee = 97\%$ ;

$[\alpha]_{\text{D}}^{25} = -77.1$  ( $c = 0.90$  in DCM).

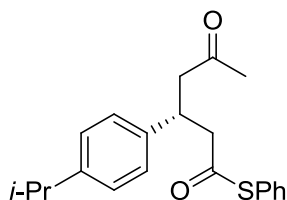

**(R)-S-phenyl 3-(4-isopropylphenyl)-5-oxohexanethioate (3ca)** (Table 2, entry 3). 59.2 mg, 87%

yield; Colorless oil;  $^1\text{H NMR}$  (500 MHz,  $\text{CDCl}_3$ )  $\delta$  (ppm): 7.38 – 7.36 (m, 3H), 7.30 (dd,  $J = 6.6, 3.0$

Hz, 2H), 7.17 – 7.13 (m, 4H), 3.74 (p,  $J = 7.2$  Hz, 1H), 3.02 – 2.80 (m, 5H), 2.06 (s, 3H), 1.24 (d,  $J =$

6.9 Hz, 6H);  $^{13}\text{C}$  NMR (125 MHz,  $\text{CDCl}_3$ )  $\delta$  (ppm): 206.73, 195.99, 147.45, 139.72, 134.39, 129.35,

129.12, 127.60, 127.23, 126.66, 49.49, 49.02, 37.44, 33.65, 30.31, 23.94, 23.91; HRMS (ESI) calcd for

$\text{C}_{21}\text{H}_{24}\text{O}_2\text{SNa}^+$  [ $\text{M} + \text{Na}^+$ ] 363.1389, found 363.1407; HPLC (Chiralpak IC, *i*-propanol/hexane = 20/80,

flow rate 1.0 mL/min,  $\lambda = 254$  nm):  $t_{\text{R}}$  (major) = 11.3 min,  $t_{\text{R}}$  (minor) = 16.9 min,  $ee = 97\%$ ;  $[\alpha]_{\text{D}}^{25} =$

-64.2 ( $c = 1.23$  in DCM).

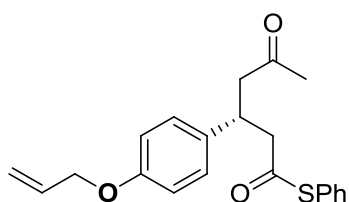

**(R)-S-phenyl 3-(4-(allyloxy)phenyl)-5-oxohexanethioate (3da)** (Table 2, entry 4). 50.4 mg, 71% yield; Colorless oil;  $^1\text{H}$  NMR (500 MHz,  $\text{CDCl}_3$ )  $\delta$  (ppm): 7.41 – 7.34 (m, 2H), 7.33 – 7.27 (m, 2H), 7.17 – 7.11 (m, 2H), 6.89 – 6.83 (m, 2H), 6.05 (ddt,  $J = 17.2, 10.5, 5.3$  Hz, 1H), 5.40 (ddd,  $J = 17.2, 3.1, 1.5$  Hz, 1H), 5.28 (ddd,  $J = 10.5, 2.6, 1.3$  Hz, 1H), 4.51 (dt,  $J = 5.3, 1.4$  Hz, 2H), 3.71 (p,  $J = 7.2$  Hz, 1H), 3.00 – 2.77 (m, 4H), 2.04 (s, 3H);  $^{13}\text{C}$  NMR (125 MHz,  $\text{CDCl}_3$ )  $\delta$  (ppm): 206.70, 195.90, 157.48, 134.59, 134.37, 133.28, 129.35, 129.11, 128.34, 127.55, 117.58, 114.84, 68.79, 49.60, 49.12, 37.15, 30.35; HRMS (ESI) calcd for  $\text{C}_{21}\text{H}_{22}\text{O}_3\text{SNa}^+$  [ $\text{M} + \text{Na}^+$ ] 377.1182, found 377.1191; HPLC (Chiralpak IC, *i*-propanol/hexane = 20/80, flow rate 1.0 mL/min,  $\lambda = 254$  nm):  $t_{\text{R}}$  (major) = 15.7 min,  $t_{\text{R}}$  (minor) = 24.6 min,  $ee = 96\%$ ;  $[\alpha]_{\text{D}}^{25} = -79.8$  ( $c = 1.16$  in DCM).

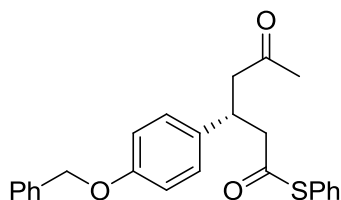

**(R)-S-phenyl 3-(4-(benzyloxy)phenyl)-5-oxohexanethioate (3ea)** (Table 2, entry 5). 63.1mg, 78% yield; White solid;  $^1\text{H}$  NMR (500 MHz,  $\text{CDCl}_3$ )  $\delta$  (ppm): 7.44 – 7.42 (m, 2H), 7.39 – 7.37 (m, 5H), 7.34 – 7.29 (m, 3H), 7.15 (d,  $J = 8.6$  Hz, 2H), 6.93 (d,  $J = 8.6$  Hz, 2H), 5.04 (s, 2H), 3.72 (p,  $J = 7.2$  Hz, 1H), 3.00 – 2.78 (m, 4H), 2.05 (s, 3H);  $^{13}\text{C}$  NMR (125 MHz,  $\text{CDCl}_3$ )  $\delta$  (ppm): 206.68, 195.90, 157.69, 136.99, 134.72, 134.37, 129.36, 129.13, 128.54, 128.39, 127.92, 127.55, 127.45, 114.97, 70.00, 49.60, 49.12, 37.15, 30.36; HRMS (ESI) calcd for  $\text{C}_{25}\text{H}_{24}\text{O}_3\text{SNa}^+$  [ $\text{M} + \text{Na}^+$ ] 427.1338, found 427.1324; HPLC (Chiralpak IC, *i*-propanol/hexane = 20/80, flow rate 1.0 mL/min,  $\lambda = 254$  nm):  $t_{\text{R}}$  (major) = 18.4

min,  $t_R$  (minor) = 28.4 min,  $ee = 97\%$ ;  $[\alpha]_D^{25} = -71.0$  ( $c = 1.29$  in DCM).

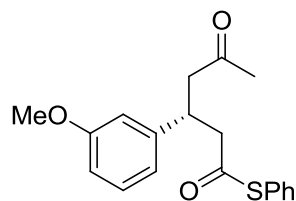

**(R)-S-phenyl 3-(3-methoxyphenyl)-5-oxohexanethioate (3fa)** (Table 2, entry 6). 49.2 mg, 75% yield;

Colorless oil;  $^1\text{H}$  NMR (500 MHz,  $\text{CDCl}_3$ )  $\delta$  (ppm): 7.39 – 7.37 (m, 3H), 7.32 – 7.30 (m, 2H), 7.23 (dd,  $J = 8.8, 7.7$  Hz, 1H), 6.82 (d,  $J = 7.8$  Hz, 1H), 6.77 (dd,  $J = 3.8, 1.5$  Hz, 2H), 3.80 (s, 3H), 3.74 (p,  $J = 7.2$  Hz, 1H), 3.01 – 2.80 (m, 4H), 2.06 (s, 3H);  $^{13}\text{C}$  NMR (125 MHz,  $\text{CDCl}_3$ )  $\delta$  (ppm): 206.51, 195.84, 159.78, 144.13, 134.40, 129.69, 129.40, 129.15, 127.55, 119.62, 113.38, 112.18, 55.19, 49.32, 48.87, 37.84, 30.36; HRMS (ESI) calcd for  $\text{C}_{19}\text{H}_{20}\text{O}_3\text{SNa}^+$  [ $\text{M} + \text{Na}^+$ ] 351.1025, found 351.1009; HPLC (Chiralpak IC, *i*-propanol/hexane = 20/80, flow rate 1.0 mL/min,  $\lambda = 254$  nm):  $t_R$  (major) = 25.2 min,  $t_R$  (minor) = 27.1 min,  $ee = 97\%$ ;  $[\alpha]_D^{25} = -69.5$  ( $c = 0.96$  in DCM).

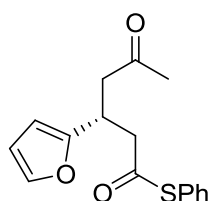

**(R)-S-phenyl 3-(furan-2-yl)-5-oxohexanethioate (3ga)** (Table 2, entry 7). 49.0mg, 85% yield;

Colorless oil;  $^1\text{H}$  NMR (500 MHz,  $\text{CDCl}_3$ )  $\delta$  (ppm): 7.40 – 7.38 (m, 3H), 7.37 – 7.34 (m, 2H), 7.32 (dd,  $J = 1.8, 0.8$  Hz, 1H), 6.28 (dd,  $J = 3.2, 1.9$  Hz, 1H), 6.07 (d,  $J = 3.2$  Hz, 1H), 3.86 (p,  $J = 6.9$  Hz, 1H), 3.06 – 2.97 (m, 2H), 2.92 – 2.83 (m, 2H), 2.11 (s, 3H);  $^{13}\text{C}$  NMR (125 MHz,  $\text{CDCl}_3$ )  $\delta$  (ppm): 206.21, 195.64, 155.15, 141.47, 134.41, 129.45, 129.18, 127.46, 110.23, 105.73, 46.54, 46.20, 31.38, 30.16; HRMS (ESI) calcd for  $\text{C}_{16}\text{H}_{16}\text{O}_3\text{SNa}^+$  [ $\text{M} + \text{Na}^+$ ] 311.0712, found 311.0716; HPLC (Chiralpak IC, *i*-propanol/hexane = 20/80, flow rate 1.0 mL/min,  $\lambda = 254$  nm):  $t_R$  (major) = 16.2 min,  $t_R$  (minor) = 39.8

min,  $ee = 98\%$ ;  $[\alpha]_{\text{D}}^{25} = -43.7$  ( $c = 1.13$  in DCM).

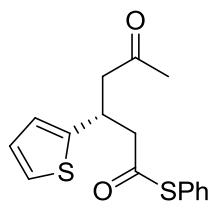

**(R)-S-phenyl 5-oxo-3-(thiophen-2-yl)hexanethioate (3ha)** (Table 2, entry 8). 46.3 mg, 76% yield;

Colorless oil;  $^1\text{H}$  NMR (500 MHz,  $\text{CDCl}_3$ )  $\delta$  (ppm): 7.40 – 7.38 (m, 3H), 7.35 – 7.33 (m, 2H), 7.16 (d,

$J = 5.0$  Hz, 1H), 6.92 (dd,  $J = 5.0, 3.5$  Hz, 1H), 6.88 (d,  $J = 3.2$  Hz, 2H), 4.09 (p,  $J = 6.9$  Hz, 1H), 3.08

– 2.99 (m, 2H), 2.98 – 2.86 (m, 2H), 2.10 (s, 3H);  $^{13}\text{C}$  NMR (125 MHz,  $\text{CDCl}_3$ )  $\delta$  (ppm): 206.07,

195.59, 145.90, 134.41, 129.46, 129.18, 127.41, 126.76, 124.54, 123.66, 49.87, 49.58, 33.14, 30.35;

HRMS (ESI) calcd for  $\text{C}_{16}\text{H}_{16}\text{O}_2\text{S}_2\text{Na}^+$  [ $\text{M} + \text{Na}^+$ ] 327.0484, found 327.0488; HPLC (Chiralpak IC,

*i*-propanol/hexane = 20/80, flow rate 1.0 mL/min,  $\lambda = 254$  nm):  $t_{\text{R}}$  (major) = 14.6 min,  $t_{\text{R}}$  (minor) = 23.0

min,  $ee = 97\%$ ;  $[\alpha]_{\text{D}}^{25} = -56.5$  ( $c = 1.05$  in DCM).

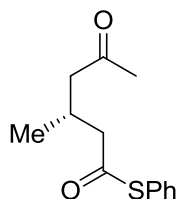

**(R)-S-phenyl 3-methyl-5-oxohexanethioate (3ia)** (Table 2, entry 9). 36.9 mg, 78% yield; Colorless

oil;  $^1\text{H}$  NMR (500 MHz,  $\text{CDCl}_3$ )  $\delta$  (ppm): 7.40 (br, 5H), 2.68 (ddd,  $J = 8.5, 6.3, 2.7$  Hz, 1H), 2.58 (ddd,

$J = 12.4, 11.4, 5.9$  Hz, 3H), 2.40 – 2.34 (m, 1H), 2.13 (s, 3H), 1.03 (d,  $J = 6.1$  Hz, 3H);  $^{13}\text{C}$  NMR (125

MHz,  $\text{CDCl}_3$ )  $\delta$  (ppm): 207.50, 196.46, 134.38, 129.37, 129.16, 127.73, 49.55, 30.30, 29.65, 27.01,

19.79; HRMS (ESI) calcd for  $\text{C}_{13}\text{H}_{16}\text{O}_2\text{SNa}^+$  [ $\text{M} + \text{Na}^+$ ] 259.0763, found 259.0761; HPLC (Chiralpak

ID, *i*-propanol/hexane = 10/90, flow rate 1.0 mL/min,  $\lambda = 254$  nm):  $t_{\text{R}}$  (major) = 10.4 min,  $t_{\text{R}}$  (minor) =

9.5 min,  $ee = 97\%$ ;  $[\alpha]_{\text{D}}^{25} = -5.7$  ( $c = 0.90$  in DCM).

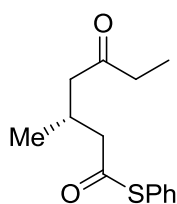

**(R)-S-phenyl 3-methyl-5-oxoheptanethioate (3ja)** (Table 2, entry 10). 35.1 mg, 70% yield; Colorless oil;  $^1\text{H}$  NMR (500 MHz,  $\text{CDCl}_3$ )  $\delta$  (ppm): 7.40 (br, 5H), 2.71 – 2.66 (m, 1H), 2.63 – 2.52 (m, 3H), 2.45 – 2.33 (m, 3H), 1.04 (dd,  $J = 12.8, 6.6$  Hz, 6H);  $^{13}\text{C}$  NMR (125 MHz,  $\text{CDCl}_3$ )  $\delta$  (ppm): 210.22, 196.53, 134.42, 129.38, 129.18, 127.81, 49.68, 48.28, 36.37, 27.15, 19.90, 7.71; HRMS (ESI) calcd for  $\text{C}_{14}\text{H}_{18}\text{O}_2\text{SNa}^+$  [ $\text{M} + \text{Na}^+$ ] 273.0920, found 273.0920; HPLC (Chiralpak IC, *i*-propanol/hexane = 20/80, flow rate 1.0 mL/min,  $\lambda = 254$  nm):  $t_{\text{R}}$  (major) = 8.2 min,  $t_{\text{R}}$  (minor) = 9.2 min,  $ee = 98\%$ ;  $[\alpha]_{\text{D}}^{25} = -6.5$  ( $c = 1.20$  in DCM).

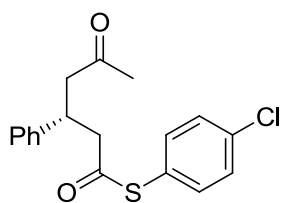

**(R)-S-4-chlorophenyl 5-oxo-3-phenylhexanethioate (3ab)** (Table 2, entry 11). 48.6 mg, 73% yield; White solid;  $^1\text{H}$  NMR (500 MHz,  $\text{CDCl}_3$ )  $\delta$  (ppm): 7.35 – 7.30 (m, 4H), 7.24 – 7.20 (m, 5H), 3.76 (p,  $J = 7.2$  Hz, 1H), 2.98 (qd,  $J = 15.1, 7.2$  Hz, 2H), 2.87 (qd,  $J = 16.9, 7.1$  Hz, 2H), 2.06 (s, 3H);  $^{13}\text{C}$  NMR (125 MHz,  $\text{CDCl}_3$ )  $\delta$  (ppm): 206.46, 195.34, 142.30, 135.81, 135.60, 129.38, 128.70, 127.36, 127.04, 125.95, 49.40, 48.92, 37.80, 30.37; HRMS (ESI) calcd for  $\text{C}_{18}\text{H}_{17}\text{O}_2\text{ClSNa}^+$  [ $\text{M} + \text{Na}^+$ ] 355.0530, found 355.0547; HPLC (Chiralpak IC, *i*-propanol/hexane = 20/80, flow rate 1.0 mL/min,  $\lambda = 254$  nm):  $t_{\text{R}}$  (major) = 12.4 min,  $t_{\text{R}}$  (minor) = 16.1 min,  $ee = 95\%$ ;  $[\alpha]_{\text{D}}^{25} = -79.7$  ( $c = 0.98$  in DCM).



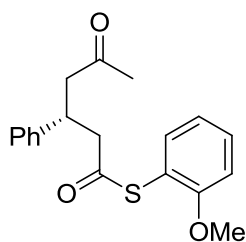

**(R)-S-2-methoxyphenyl 5-oxo-3-phenylhexanethioate (3ac)** (Table 2, entry 12). 52.6 mg, 80% yield;

Colorless oil;  $^1\text{H NMR}$  (500 MHz,  $\text{CDCl}_3$ )  $\delta$  (ppm): 7.30 (td,  $J = 8.4, 1.6$  Hz, 1H), 7.26 – 7.11 (m, 6H), 6.86 (dd,  $J = 14.6, 7.9$  Hz, 2H), 3.73 – 3.65 (m, 4H), 2.94 – 2.73 (m, 4H), 1.95 (s, 3H);  $^{13}\text{C NMR}$  (125 MHz,  $\text{CDCl}_3$ )  $\delta$  (ppm): 206.59, 195.06, 159.08, 142.54, 136.53, 131.61, 128.56, 127.36, 126.82, 121.00, 115.74, 111.51, 55.84, 49.12, 48.83, 37.87, 30.29; HRMS (ESI) calcd for  $\text{C}_{19}\text{H}_{20}\text{O}_3\text{SNa}^+$  [ $\text{M} + \text{Na}^+$ ] 351.1025, found 351.1035; HPLC (Chiralpak ID, *i*-propanol/hexane = 20/80, flow rate 1.0 mL/min,  $\lambda = 254$  nm):  $t_{\text{R}}$  (major) = 15.4 min,  $t_{\text{R}}$  (minor) = 17.3 min,  $ee = 98\%$ ;  $[\alpha]_{\text{D}}^{25} = -66.4$  ( $c = 1.15$  in DCM).

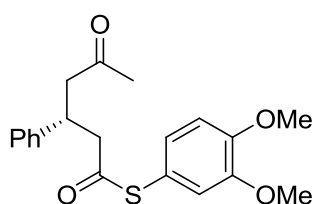

**(R)-S-3,4-dimethoxyphenyl 5-oxo-3-phenylhexanethioate (3ad)** (Table 2, entry 13). 50.9 mg, 71%

yield; Colorless oil;  $^1\text{H NMR}$  (500 MHz,  $\text{CDCl}_3$ )  $\delta$  (ppm): 7.31 – 7.28 (m, 2H), 7.21 (dd,  $J = 10.9, 4.4$  Hz, 3H), 6.86 (d,  $J = 2.5$  Hz, 2H), 6.76 (s, 1H), 3.87 (s, 3H), 3.84 (s, 3H), 3.76 (p,  $J = 7.1$  Hz, 1H), 3.00 – 2.80 (m, 4H), 2.05 (s, 3H);  $^{13}\text{C NMR}$  (125 MHz,  $\text{CDCl}_3$ )  $\delta$  (ppm): 206.53, 196.85, 150.22, 149.15, 142.46, 128.60, 127.60, 127.38, 126.90, 118.37, 117.23, 111.49, 55.92, 55.84, 49.11, 48.92, 37.82, 30.32; HRMS (ESI) calcd for  $\text{C}_{20}\text{H}_{22}\text{O}_4\text{SNa}^+$  [ $\text{M} + \text{Na}^+$ ] 381.1131, found 381.1140; HPLC (Chiralpak IA, *i*-propanol/hexane = 10/90, flow rate 1.0 mL/min,  $\lambda = 254$  nm):  $t_{\text{R}}$  (major) = 20.0 min,  $t_{\text{R}}$  (minor) = 22.2 min,  $ee = 96\%$ ;  $[\alpha]_{\text{D}}^{25} = -70.3$  ( $c = 0.95$  in DCM).

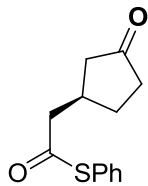

**(R)-S-phenyl 2-(3-oxocyclopentyl)ethanethioate (3ka)** (Table 2, entry 14). 29.1 mg, 62% yield; Colorless oil;  $^1\text{H}$  NMR (500 MHz,  $\text{CDCl}_3$ )  $\delta$  (ppm): 7.43 – 7.40 (m, 5H), 2.85 – 2.75 (m, 2H), 2.75 – 2.65 (m, 1H), 2.51 (dd,  $J = 18.3, 7.7$  Hz, 1H), 2.36 – 2.15 (m, 3H), 1.94 (dd,  $J = 18.4, 9.8$  Hz, 1H), 1.70 – 1.61 (m, 1H);  $^{13}\text{C}$  NMR (125 MHz,  $\text{CDCl}_3$ )  $\delta$  (ppm): 217.75, 195.86, 134.40, 129.56, 129.27, 127.36, 48.58, 44.37, 38.16, 33.97, 29.12; HRMS (ESI) calcd for  $\text{C}_{13}\text{H}_{14}\text{O}_2\text{SNa}^+$  [ $\text{M} + \text{Na}^+$ ] 257.0607, found 257.0609; HPLC (Chiralpak IC, *i*-propanol/hexane = 20/80, flow rate 1.0 mL/min,  $\lambda = 254$  nm):  $t_{\text{R}}$  (major) = 27.0 min,  $t_{\text{R}}$  (minor) = 32.6 min,  $ee = 80\%$ ;  $[\alpha]_{\text{D}}^{25} = -73.0$  ( $c = 0.86$  in DCM).

### 3. HPLC Chromatogram Profile and NMR Spectra of the Products

#### Compound 3aa

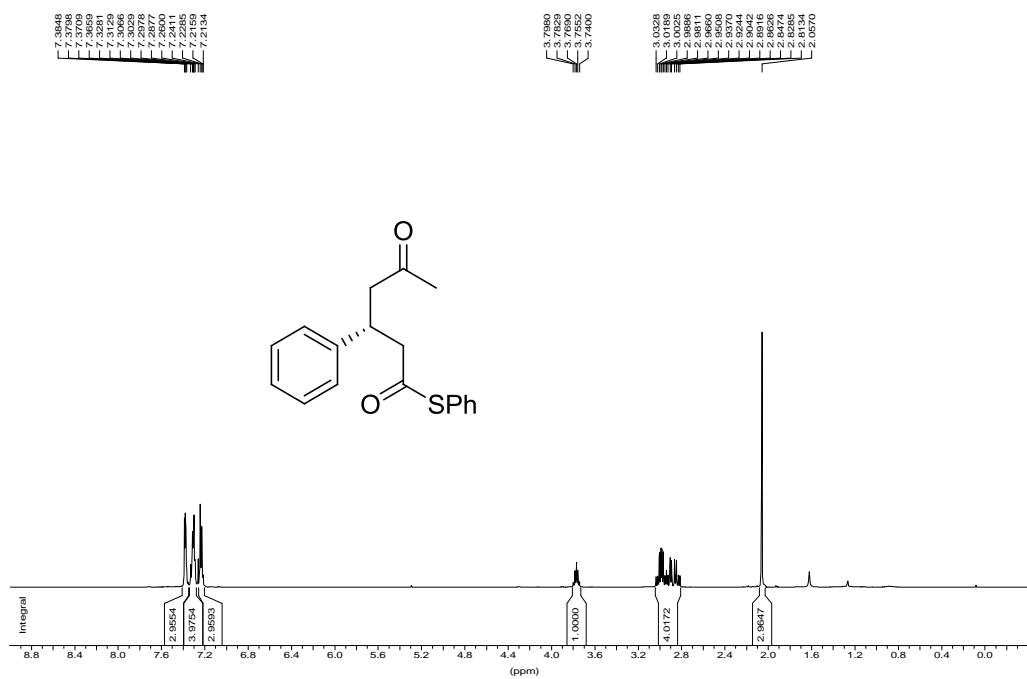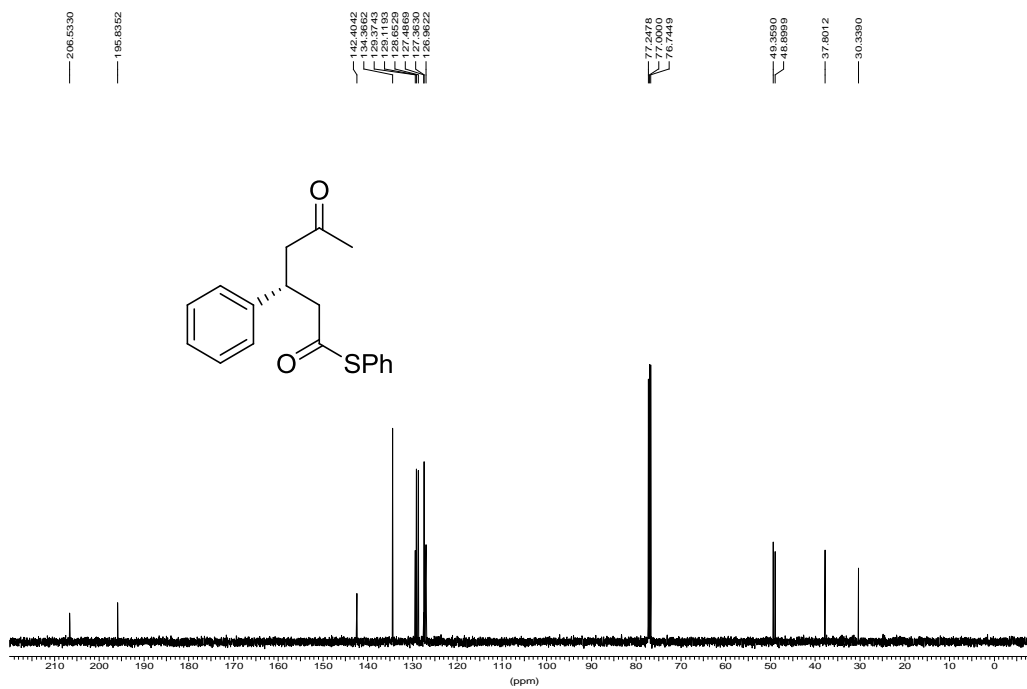

# Compound 3ba

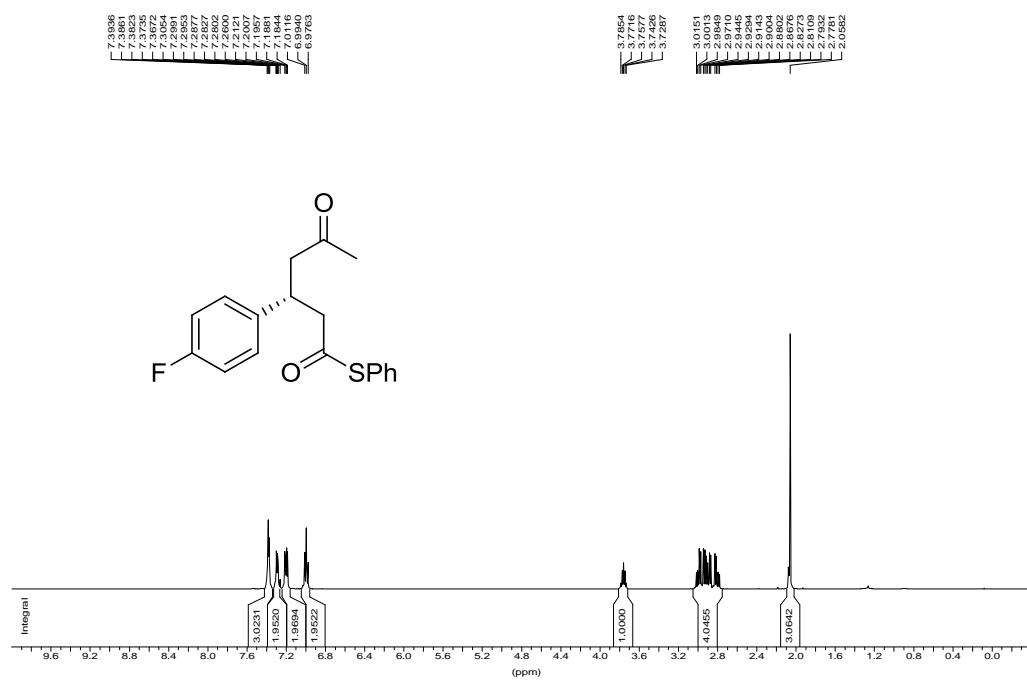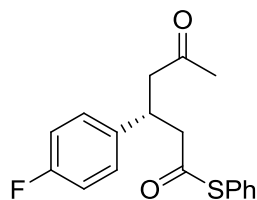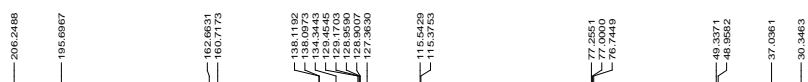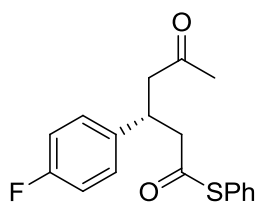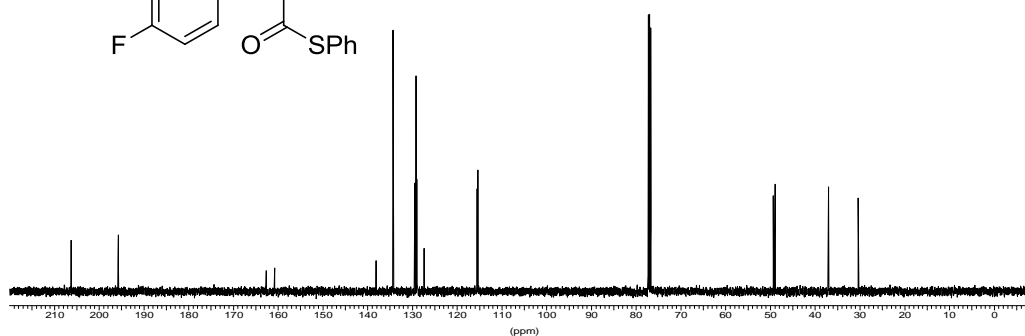

# Compound 3ca

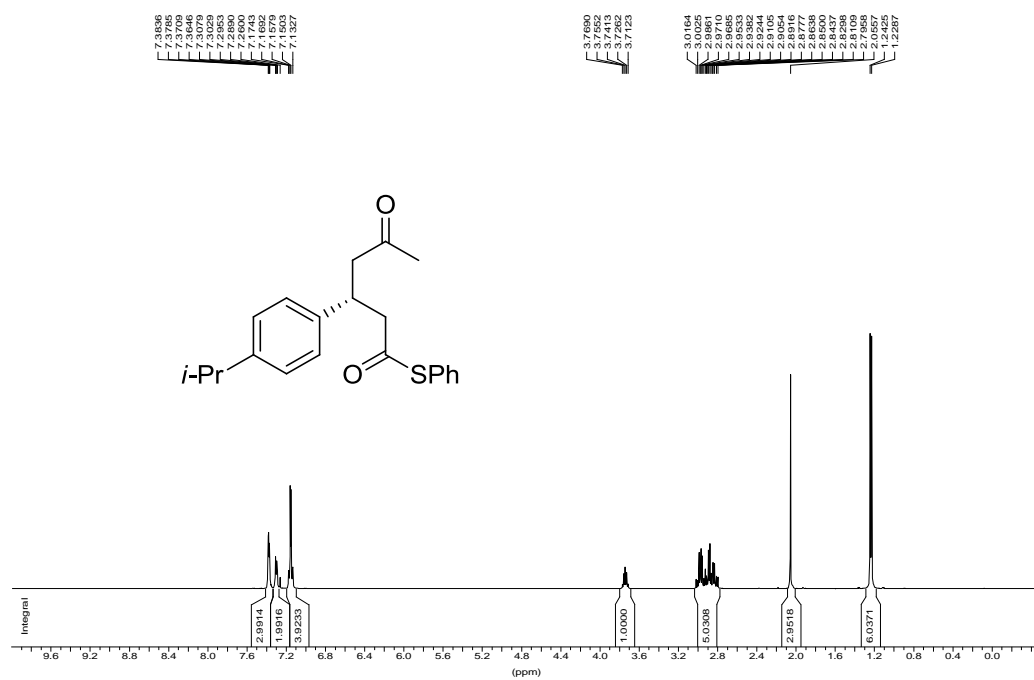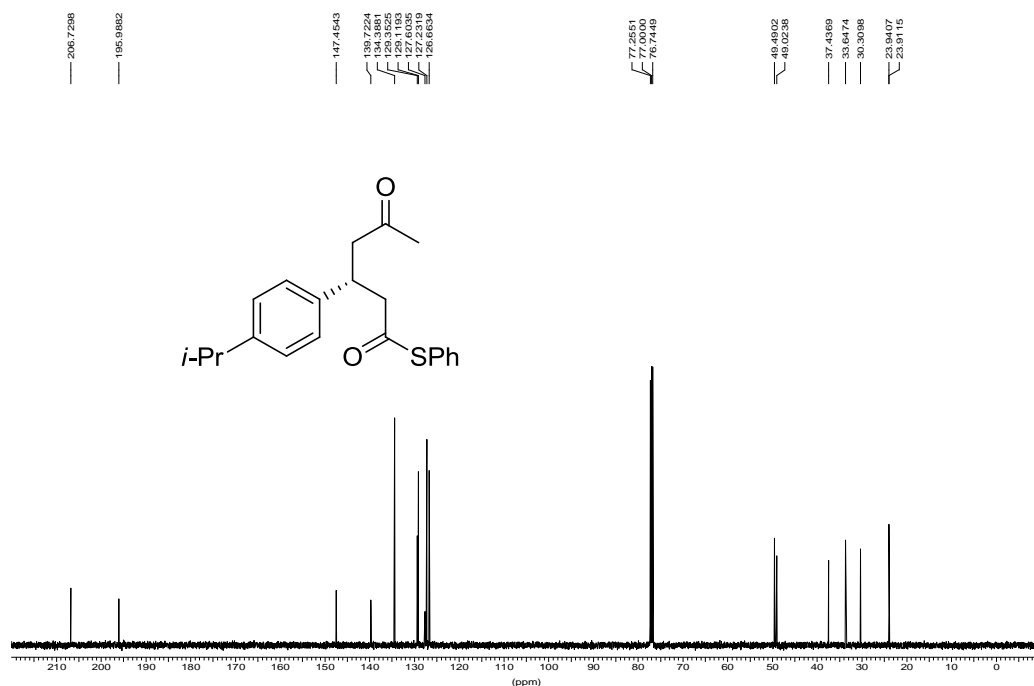

# Compound 3da

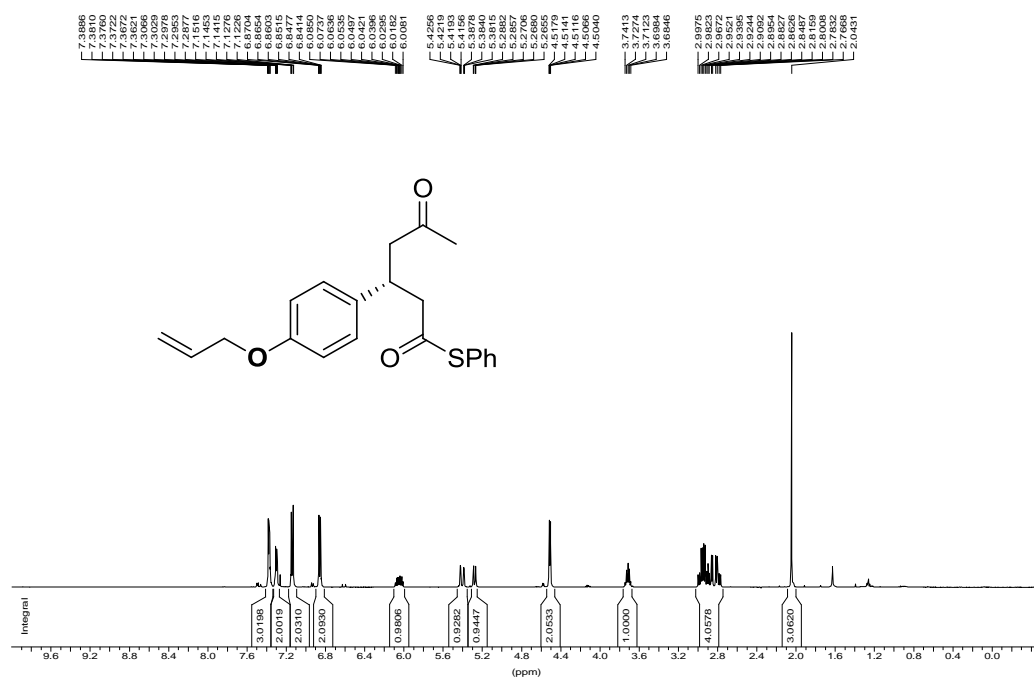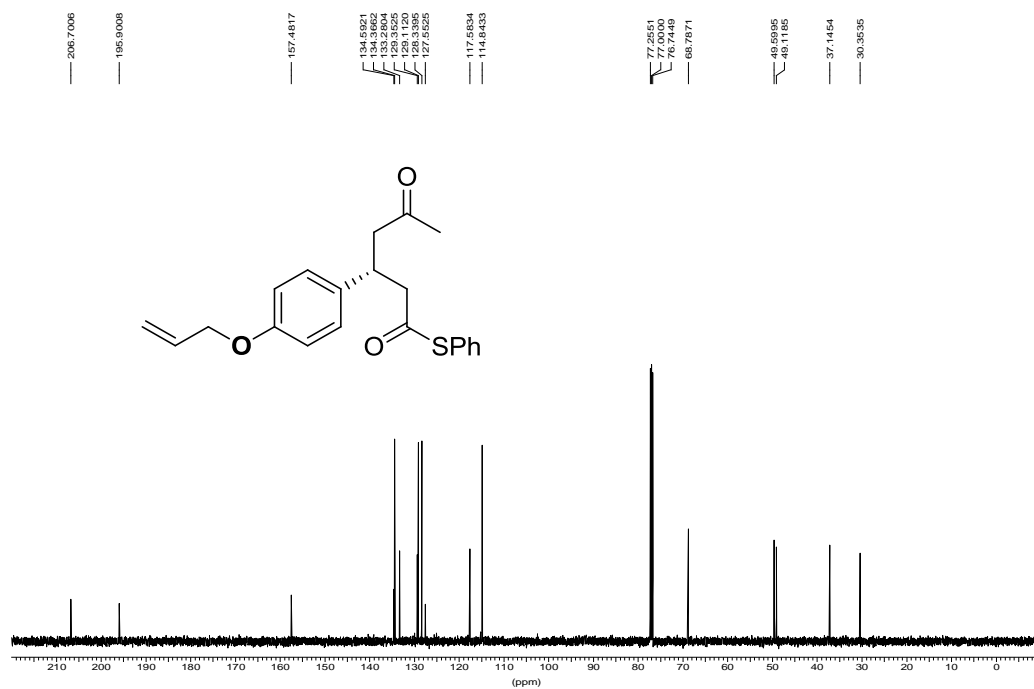

# Compound 3ea

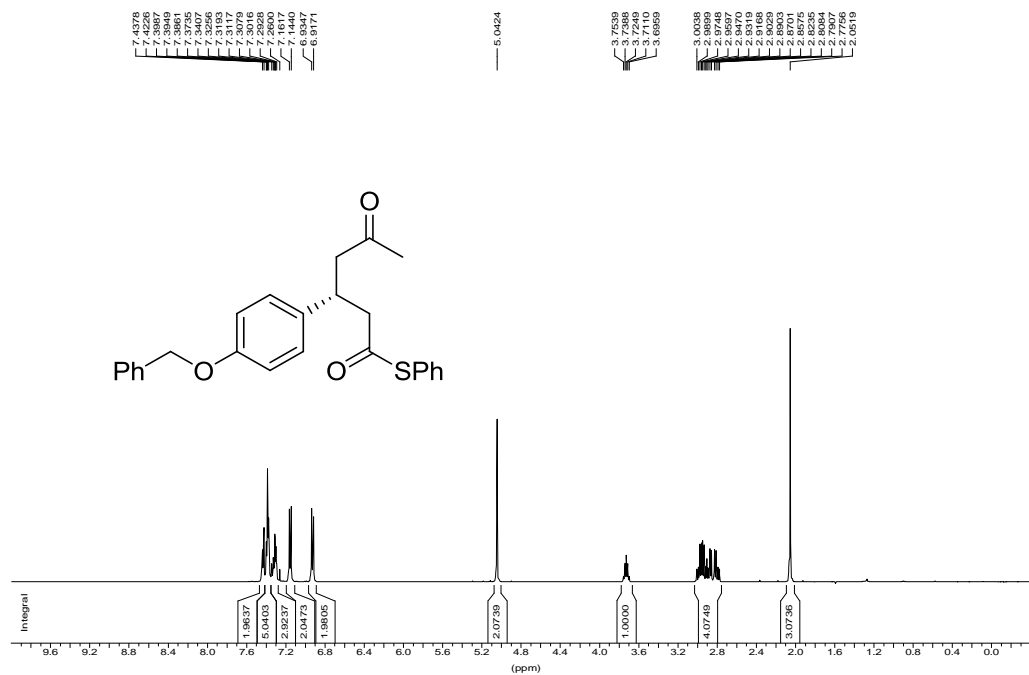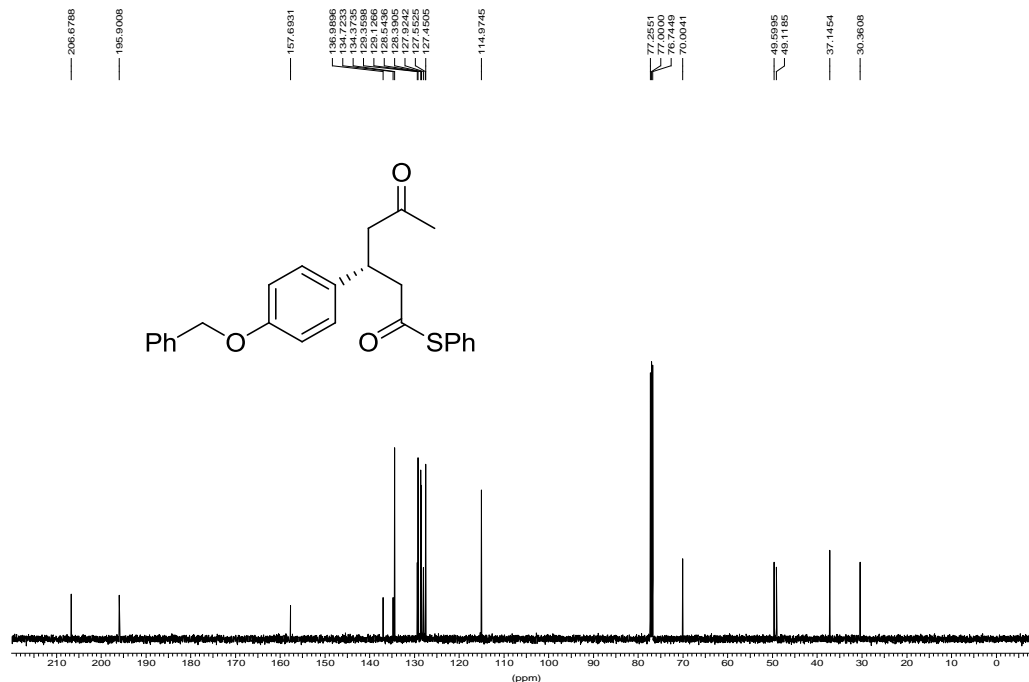

# Compound 3fa

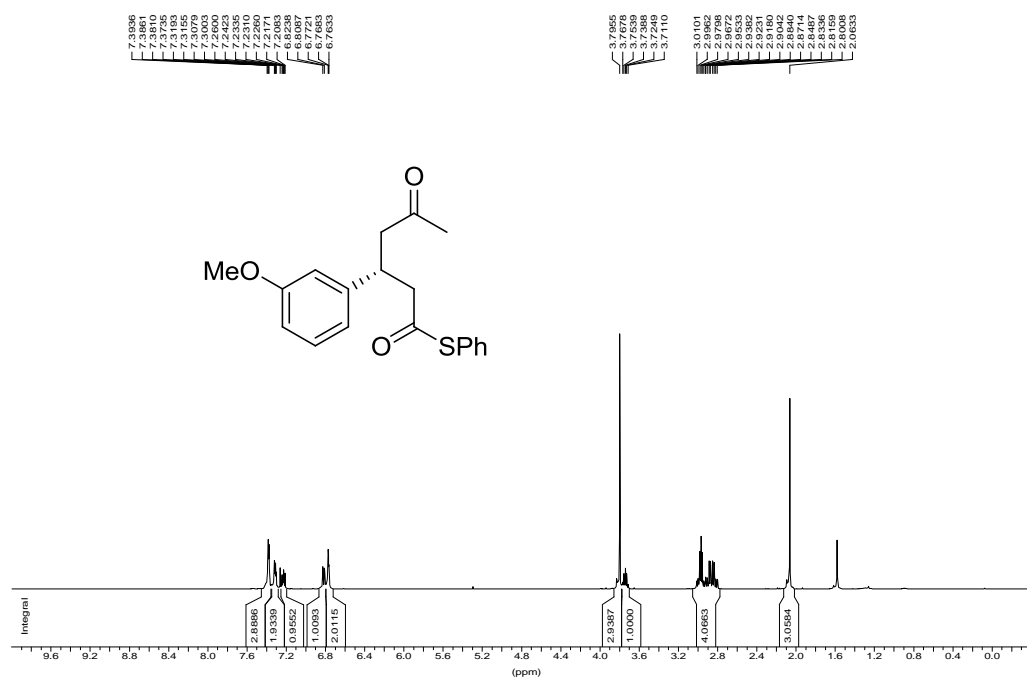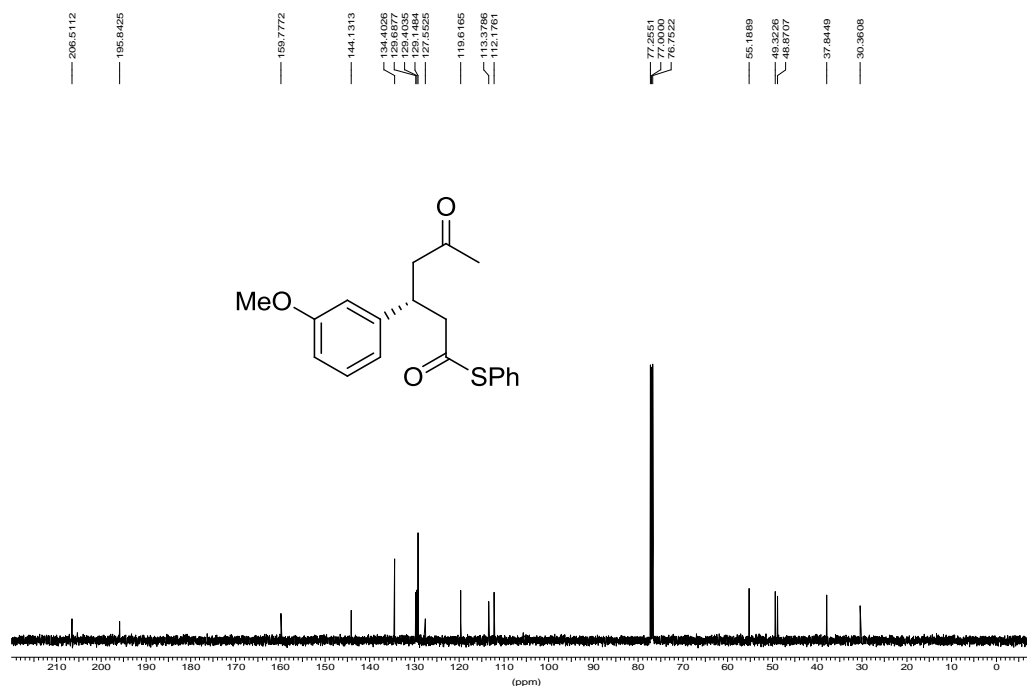



# Compound 3ga

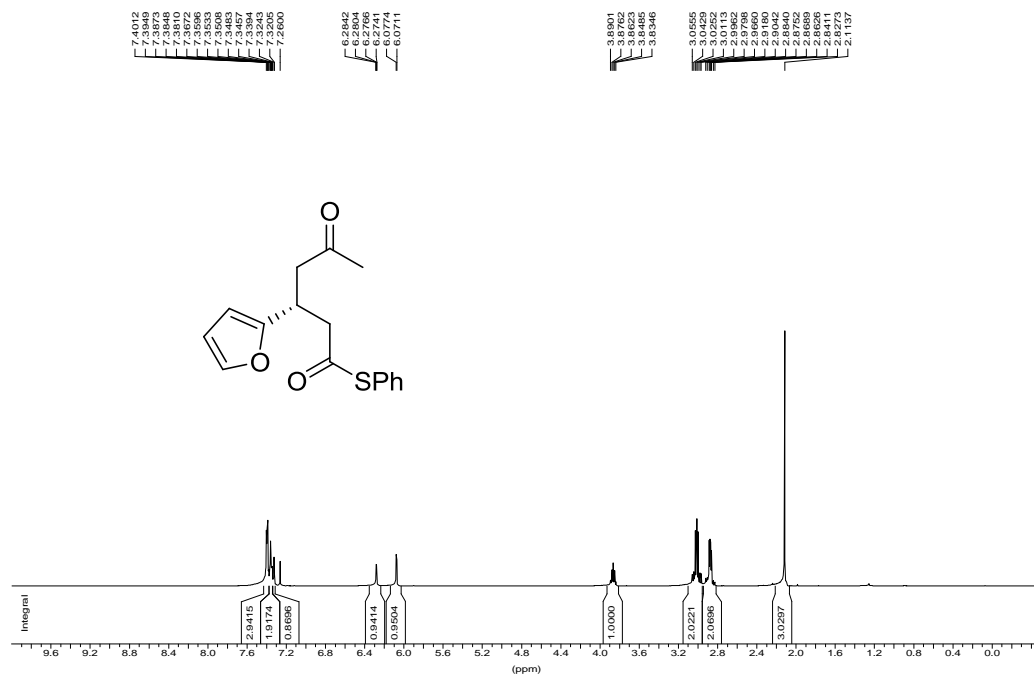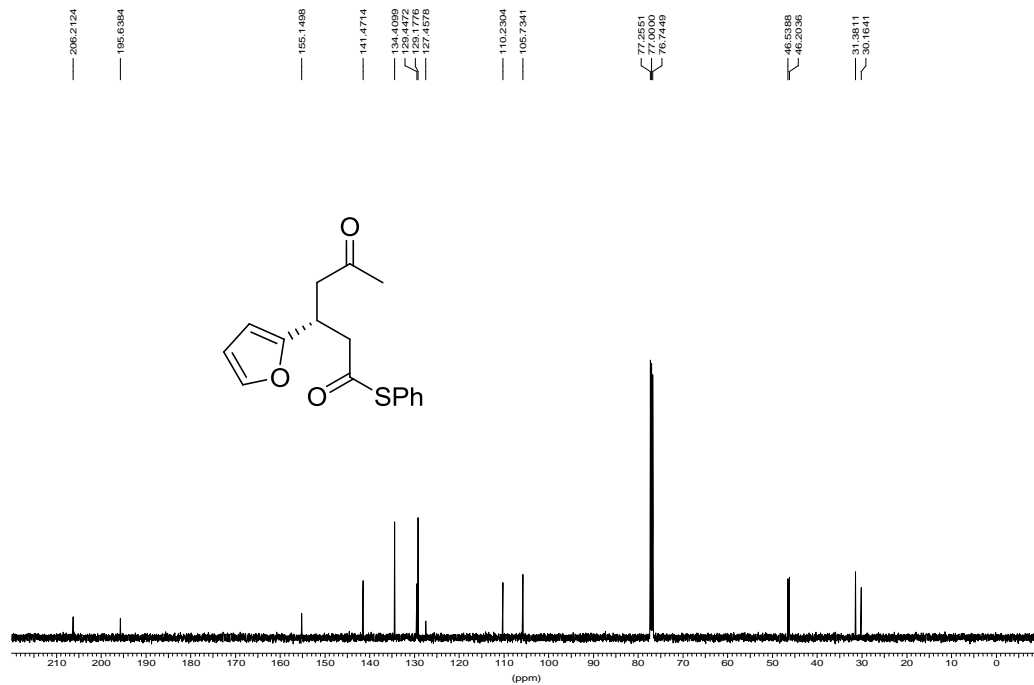

# Compound 3ha

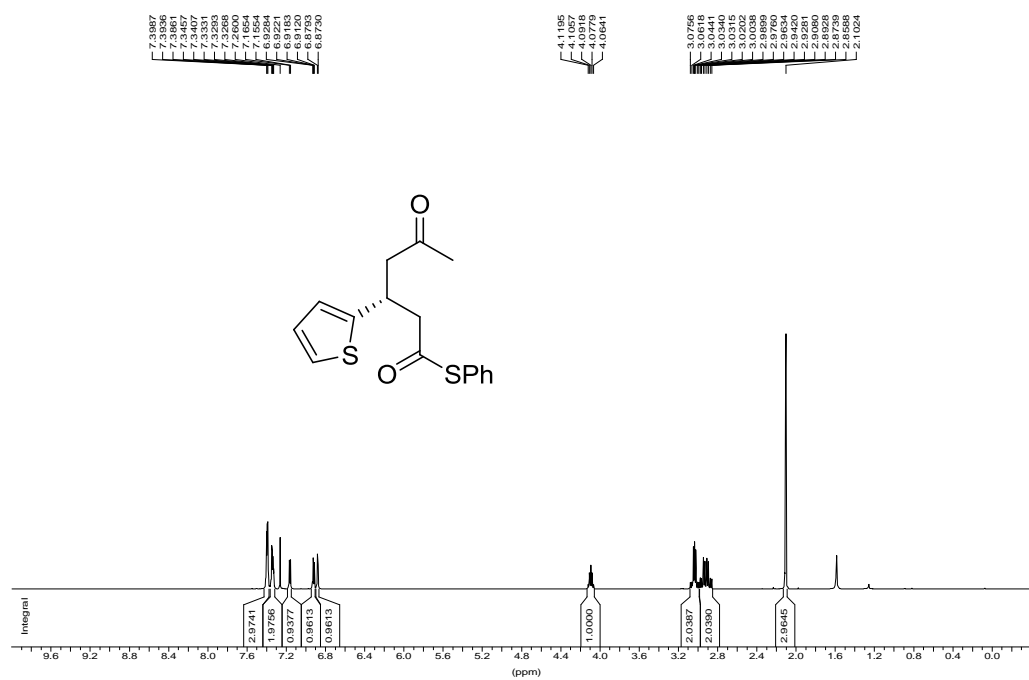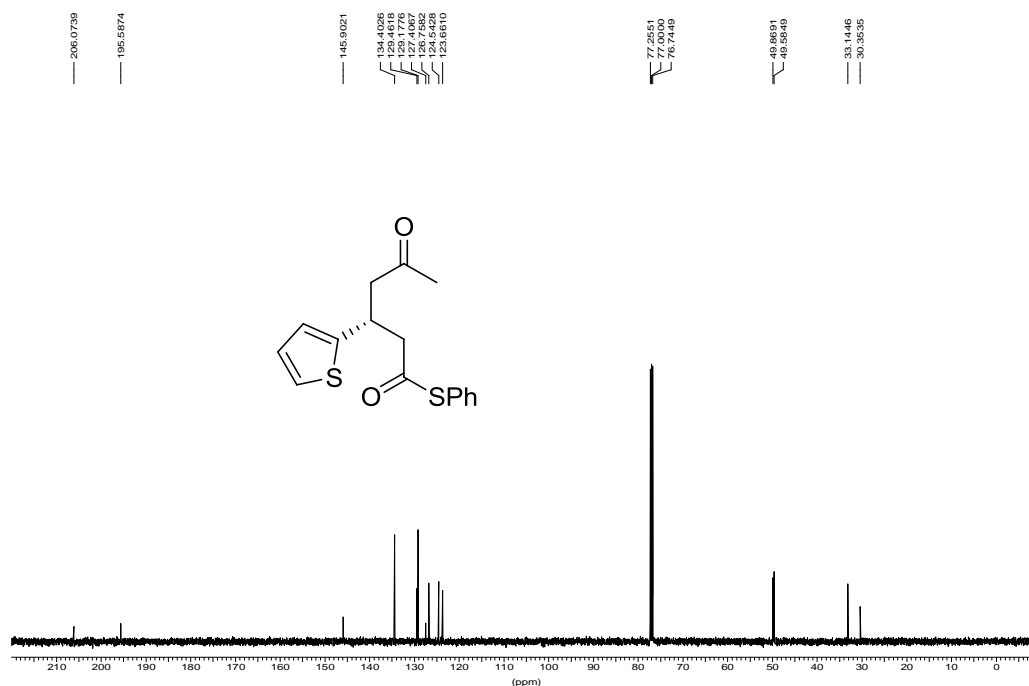

# Compound 3ia

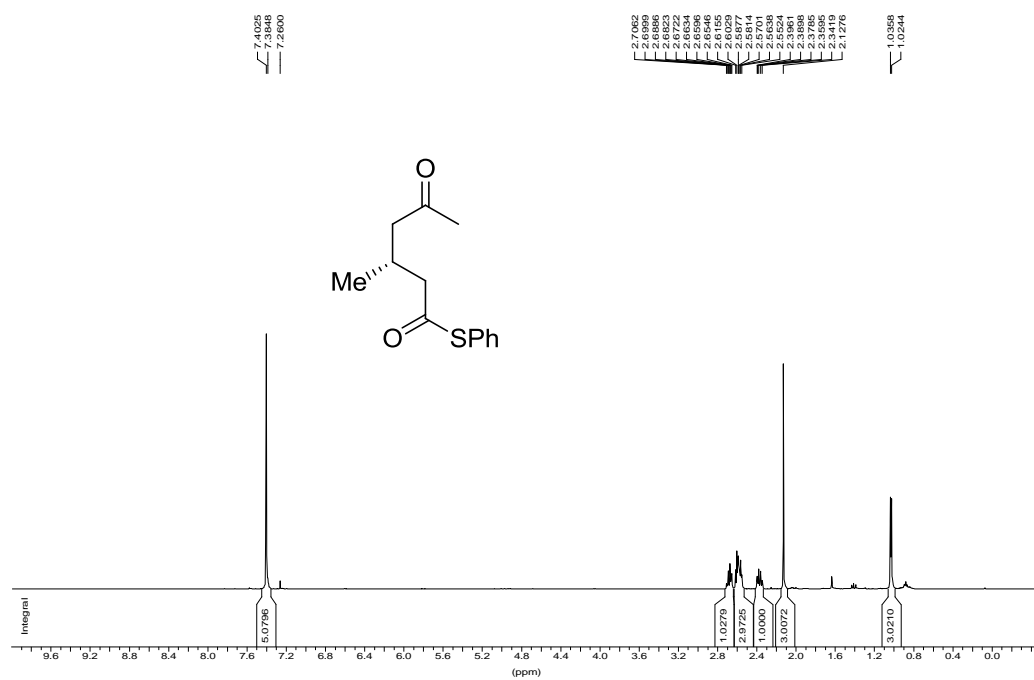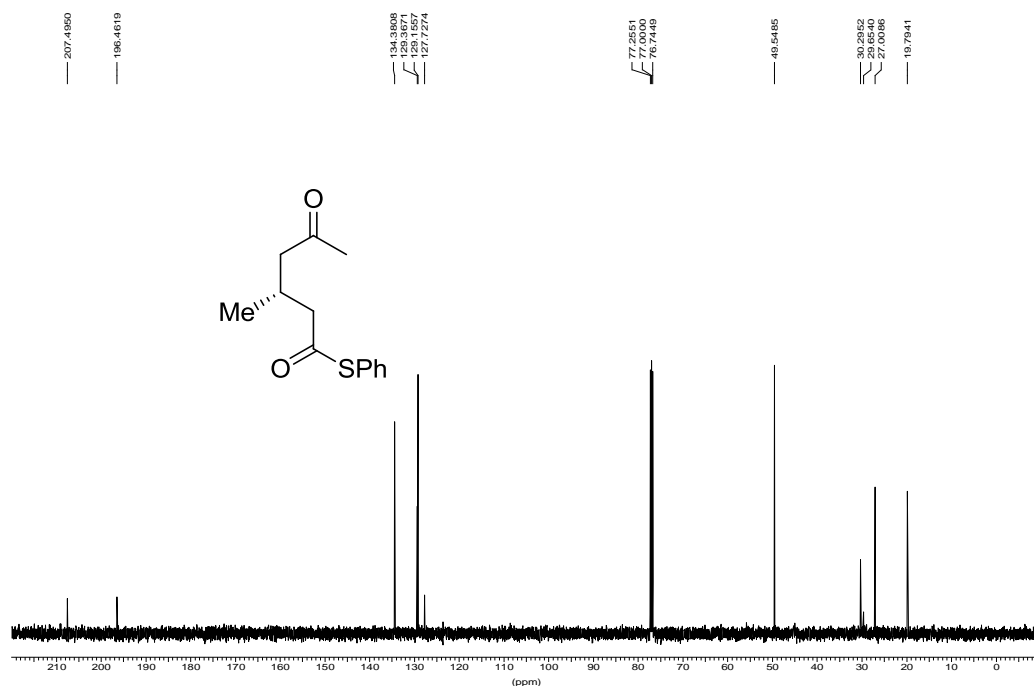

# Compound 3ja

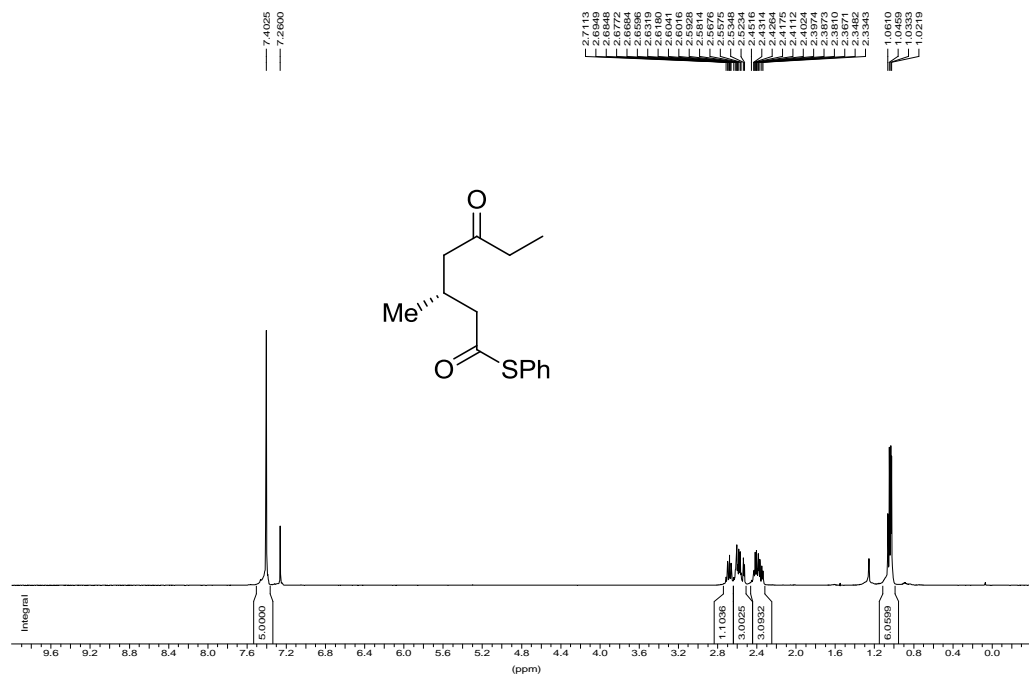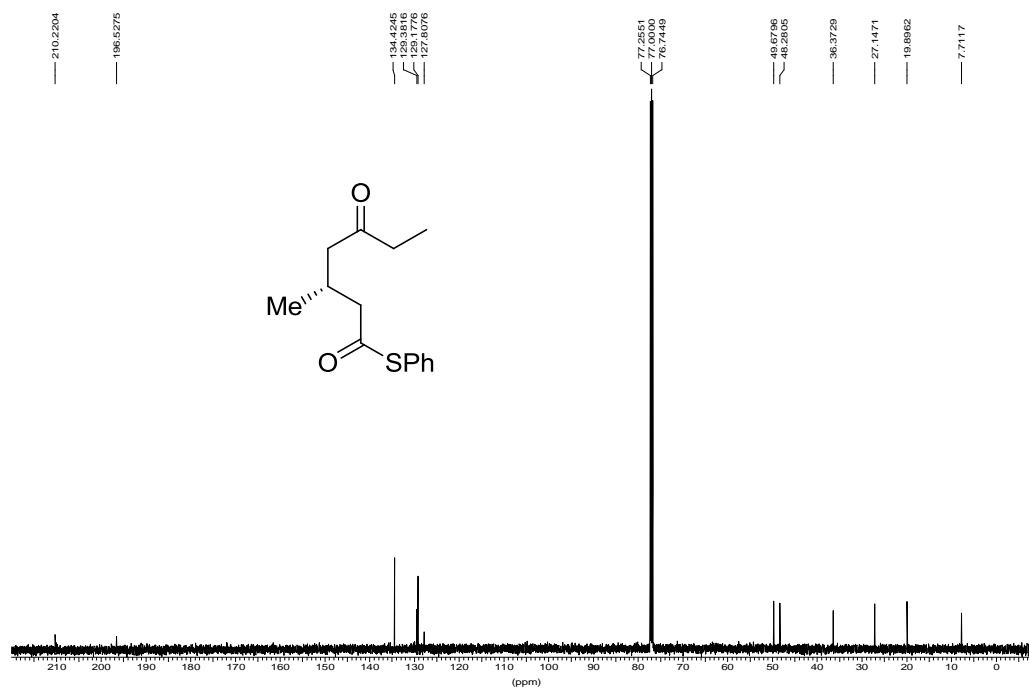

# Compound 3ab

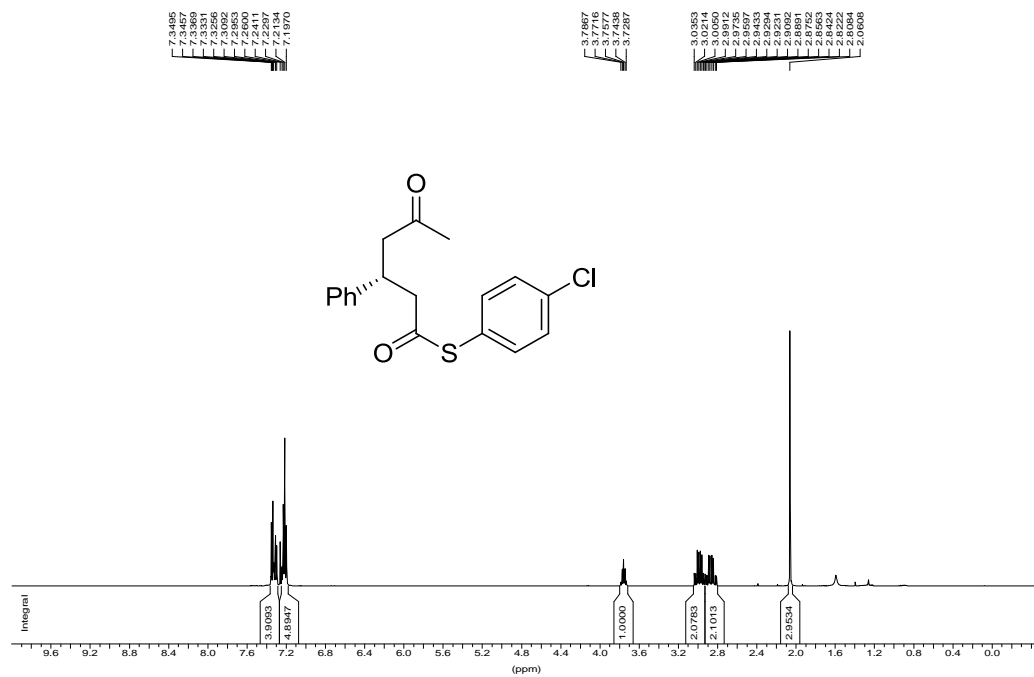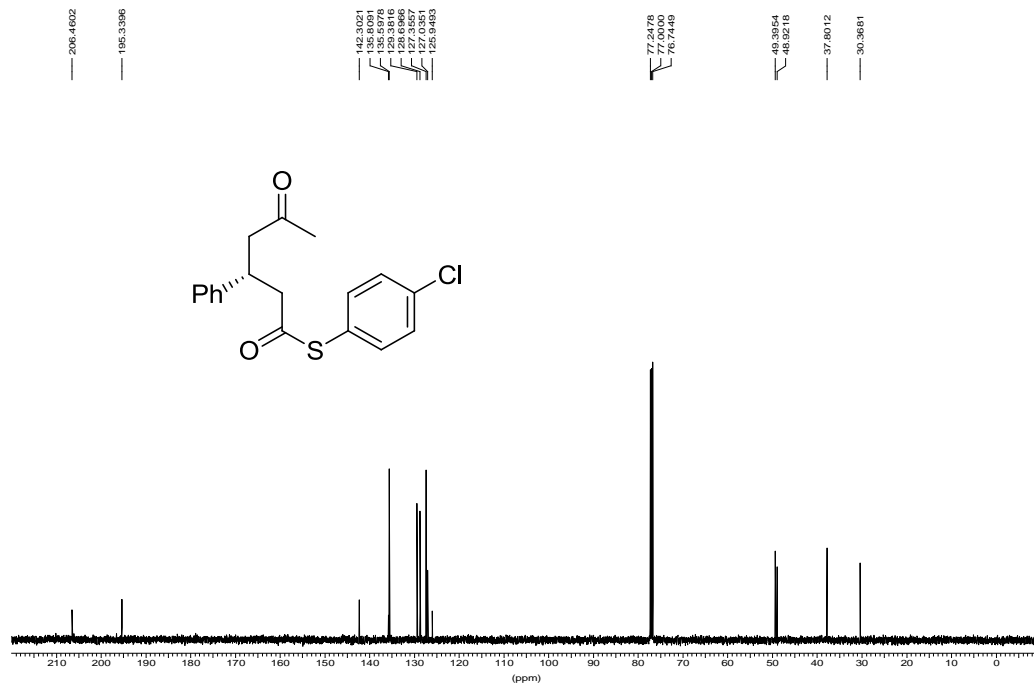

# Compound 3ac

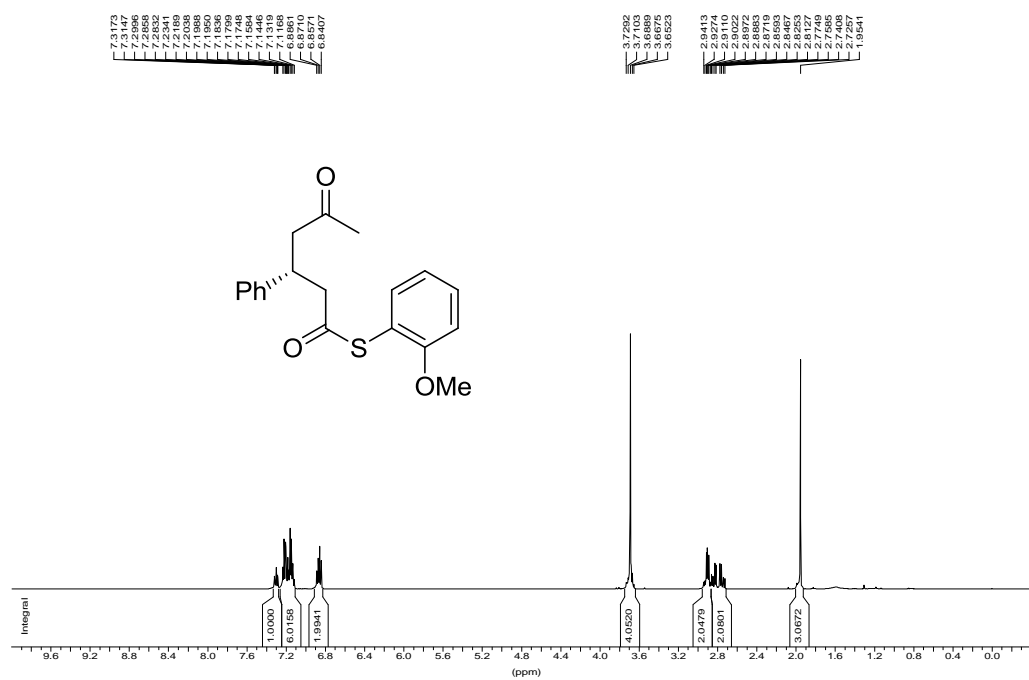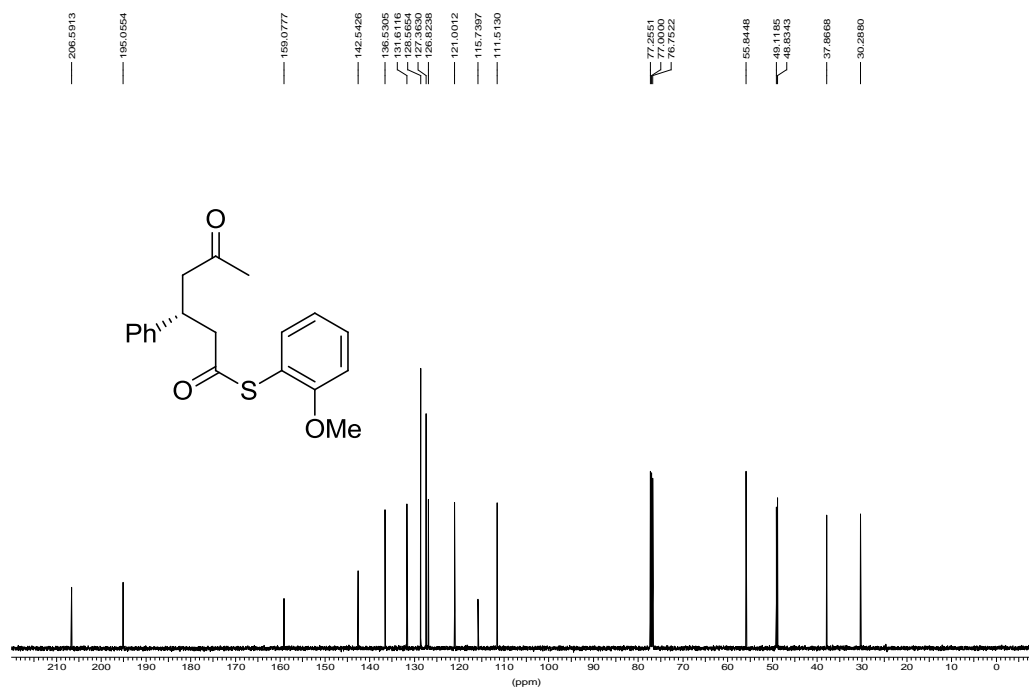

# Compound 3ad

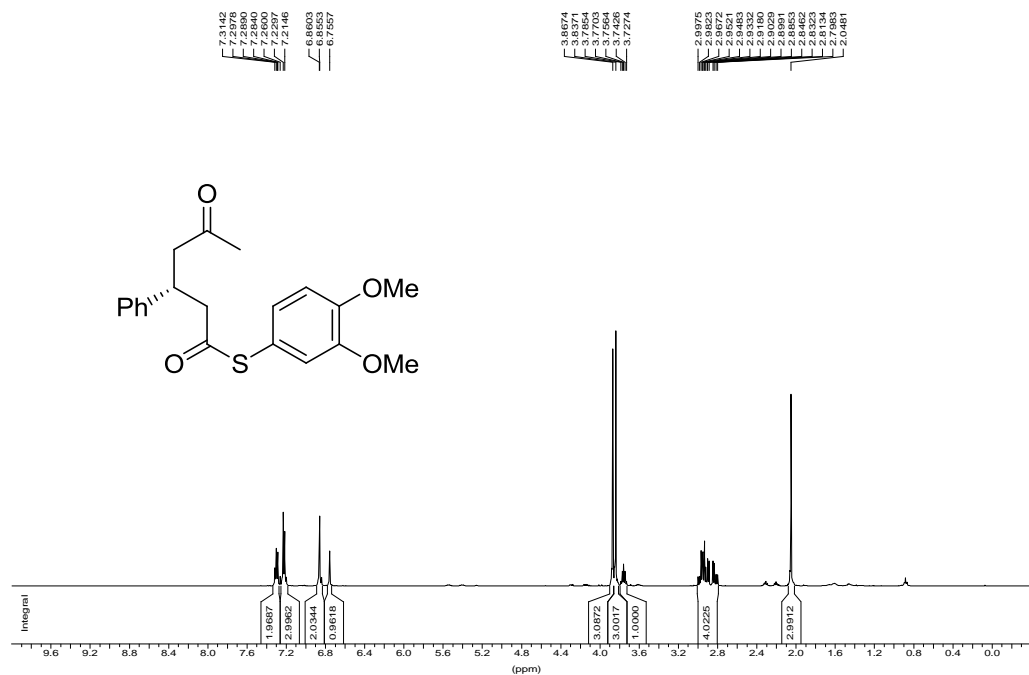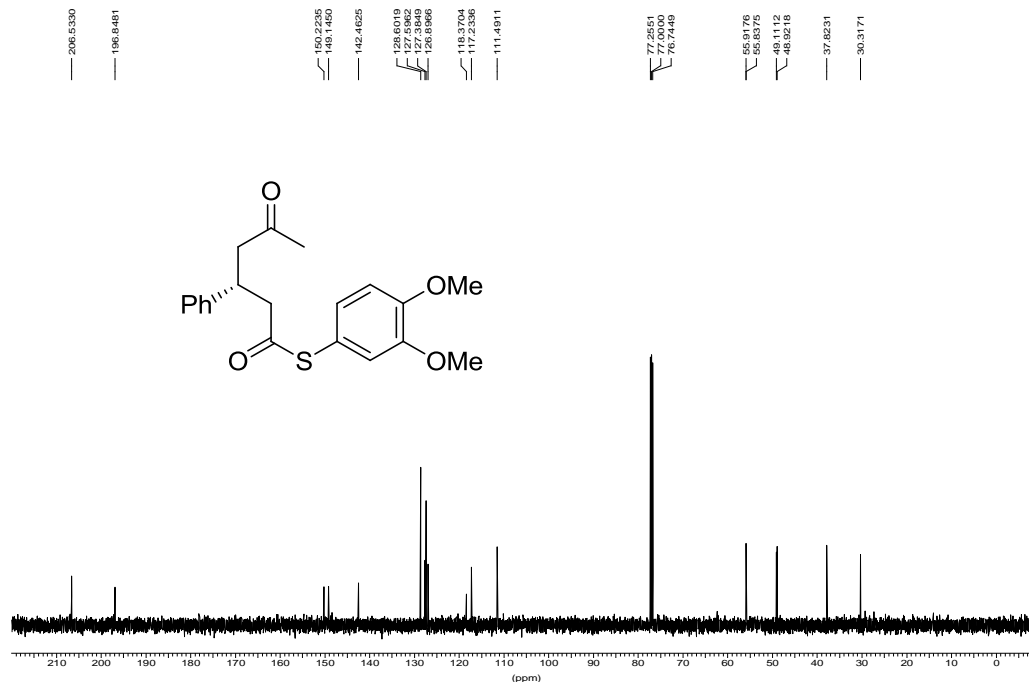

# Compound 3ka

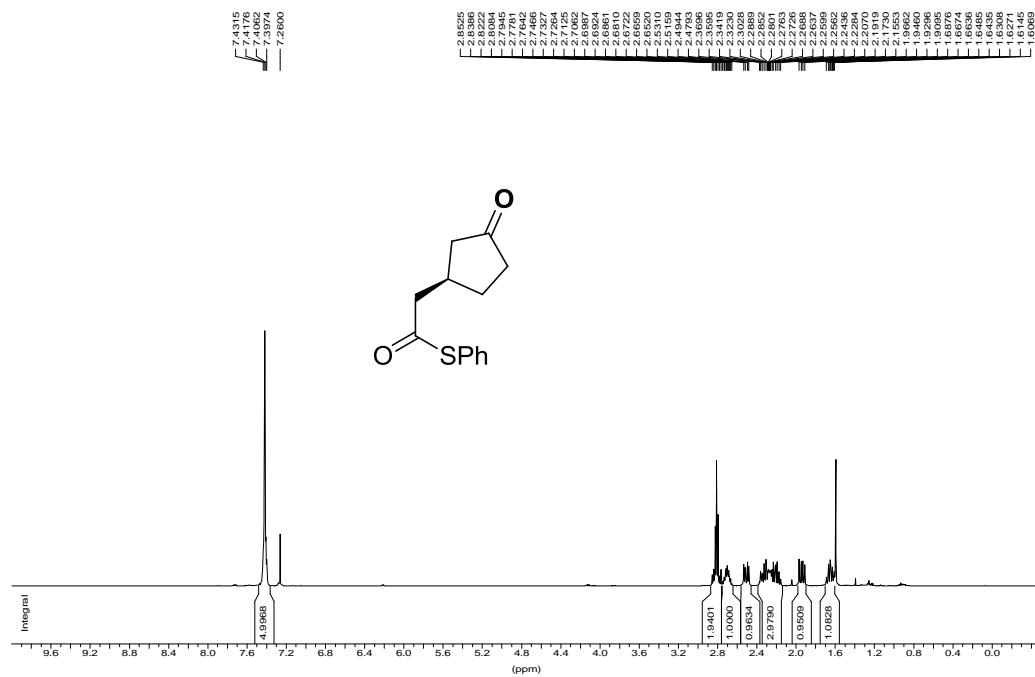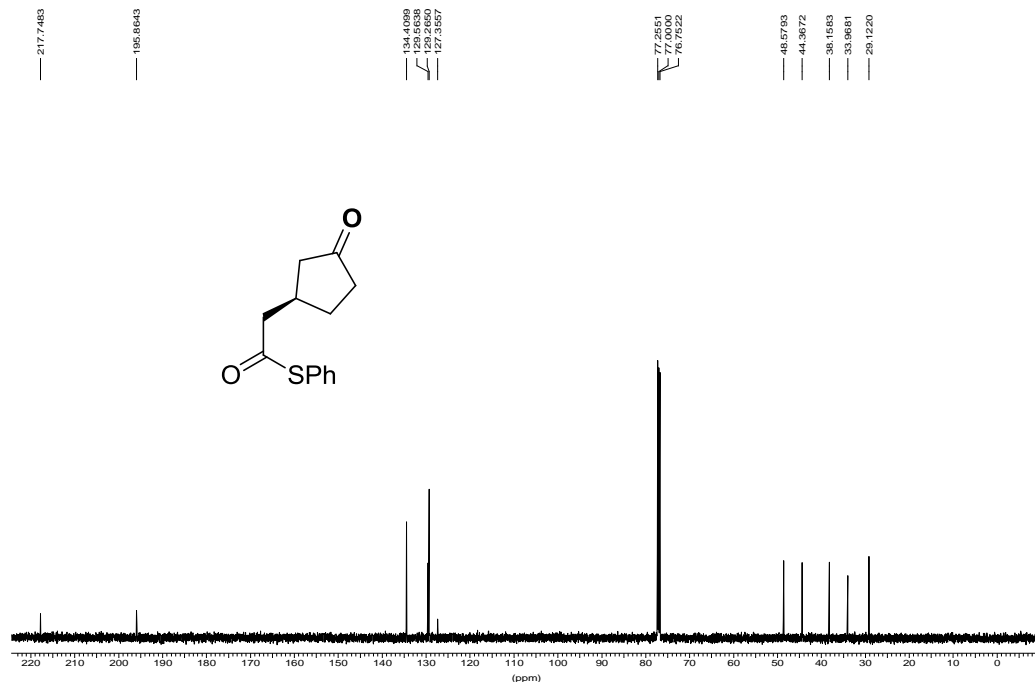



### Racemic 3aa

## ==== Shimadzu LCsolution Analysis Report ====

C:\Users\User\Desktop\LC data\Ren Qiao\rq665.lcd  
Acquired by : Admin  
Sample Name : RQD280  
Sample ID : RQ  
Data File Name : rq665.lcd  
Method File Name : 20%IPA, 1ml-min, 60min.lcm  
Batch File Name :  
Report File Name : Default.lcr  
Description : IC column ;20%IPA ;1ml/min

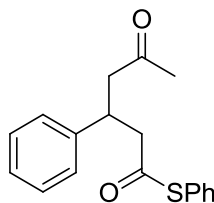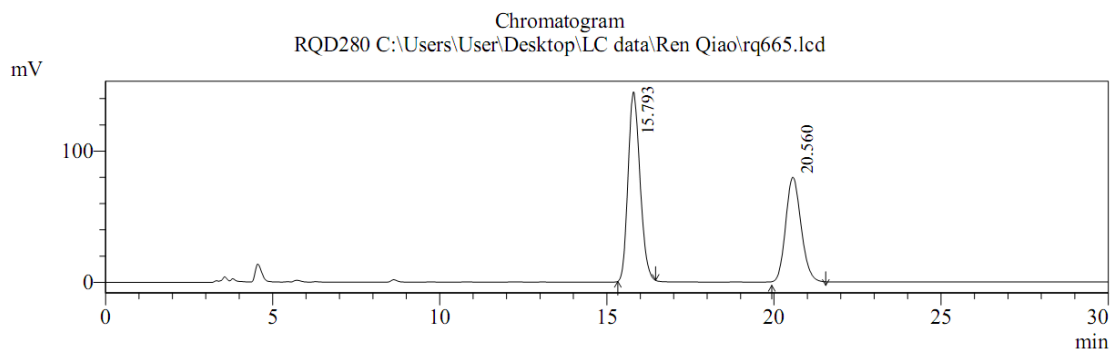

Detector A Ch1 254nm

| Peak# | Ret. Time | Area    | Height | Area %  | Height % |
|-------|-----------|---------|--------|---------|----------|
| 1     | 15.793    | 3561837 | 143991 | 55.958  | 63.624   |
| 2     | 20.560    | 2803335 | 82323  | 44.042  | 36.376   |
| Total |           | 6365171 | 226315 | 100.000 | 100.000  |

### Enantiomeric enriched 3aa

## ==== Shimadzu LCsolution Analysis Report ====

C:\Users\User\Desktop\LC data\Ren Qiao\rq687.lcd  
Acquired by : Admin  
Sample Name : RQD295-4  
Sample ID : RQ  
Data File Name : rq687.lcd  
Method File Name : 20%IPA, 1ml-min, 60min.lcm  
Batch File Name :  
Report File Name : Default.lcr  
Description : IC column ;20%IPA ;1ml/min

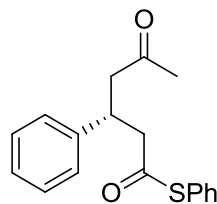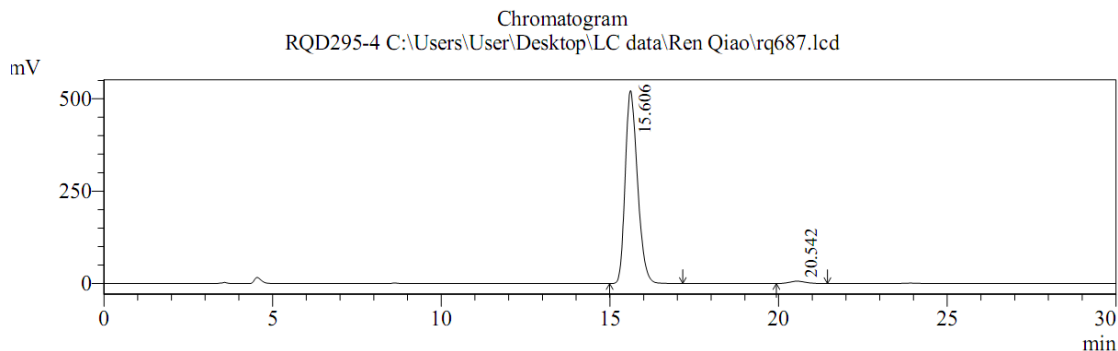

Detector A Ch1 254nm

| Peak# | Ret. Time | Area     | Height | Area %  | Height % |
|-------|-----------|----------|--------|---------|----------|
| 1     | 15.606    | 13206336 | 522074 | 98.508  | 98.804   |
| 2     | 20.542    | 199958   | 6322   | 1.492   | 1.196    |
| Total |           | 13406295 | 528396 | 100.000 | 100.000  |

### Racemic 3ba

## ==== Shimadzu LCsolution Analysis Report ====

C:\Users\User\Desktop\LC data\Ren Qiao\rq721.lcd  
Acquired by : Admin  
Sample Name : RQE032  
Sample ID : RQ  
Data File Name : rq721.lcd  
Method File Name : 20%IPA, 1ml-min, 60min.lcm  
Batch File Name :  
Report File Name : Default.lcr  
Description : IC column ;20%IPA ;1ml/min

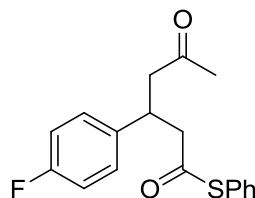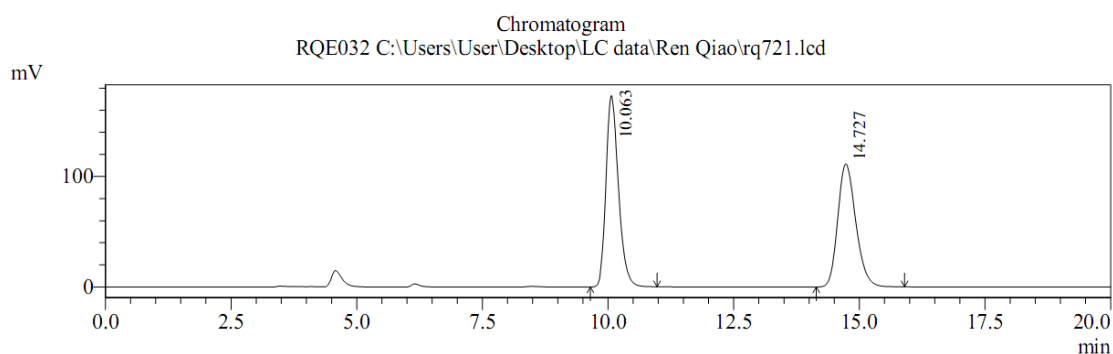

Detector A Ch1 254nm

| Peak# | Ret. Time | Area    | Height | Area %  | Height % |
|-------|-----------|---------|--------|---------|----------|
| 1     | 10.063    | 2992466 | 173286 | 51.823  | 60.857   |
| 2     | 14.727    | 2781985 | 111459 | 48.177  | 39.143   |
| Total |           | 5774451 | 284745 | 100.000 | 100.000  |

### Enantiomeric enriched 3ba

## ==== Shimadzu LCsolution Analysis Report ====

C:\Users\User\Desktop\LC data\Ren Qiao\rq732.lcd  
Acquired by : Admin  
Sample Name : RQE040  
Sample ID : RQ  
Data File Name : rq732.lcd  
Method File Name : 20%IPA, 1ml-min, 60min.lcm  
Batch File Name :  
Report File Name : Default.lcr  
Description : IC column ;20%IPA ;1ml/min

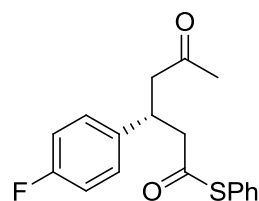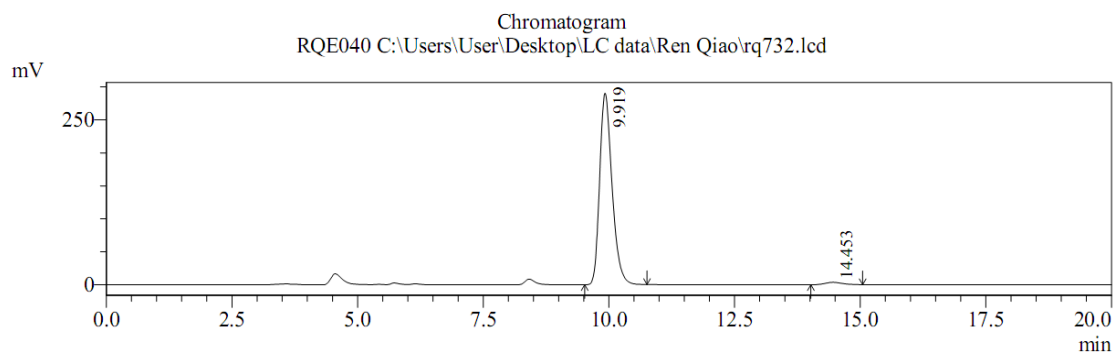

Detector A Ch1 254nm

| Peak# | Ret. Time | Area    | Height | Area %  | Height % |
|-------|-----------|---------|--------|---------|----------|
| 1     | 9.919     | 4969623 | 290271 | 98.357  | 98.762   |
| 2     | 14.453    | 83017   | 3638   | 1.643   | 1.238    |
| Total |           | 5052640 | 293909 | 100.000 | 100.000  |

### Racemic 3ca

## ==== Shimadzu LCsolution Analysis Report ====

C:\Users\User\Desktop\LC data\Ren Qiao\rq725.lcd  
Acquired by : Admin  
Sample Name : RQE034  
Sample ID : RQ  
Data File Name : rq725.lcd  
Method File Name : 20%IPA, 1ml-min, 60min.lcm  
Batch File Name :  
Report File Name : Default.lcr  
Description : IC column ;20%IPA ;1ml/min

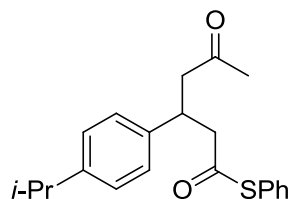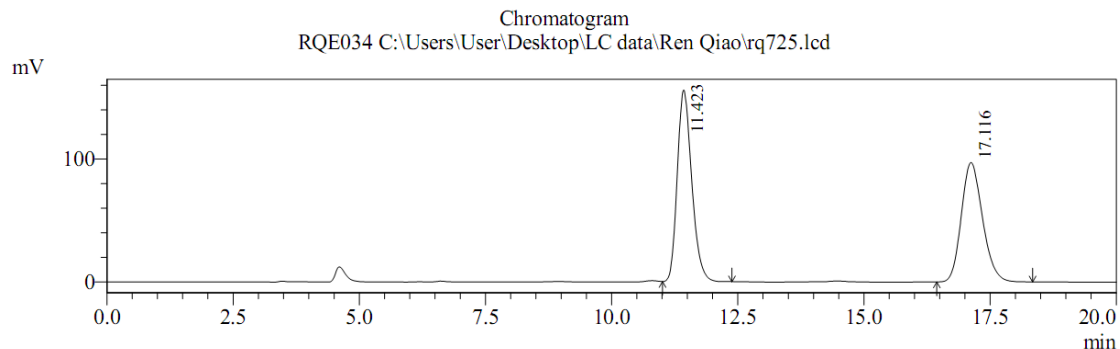

Detector A Ch1 254nm

| Peak# | Ret. Time | Area    | Height | Area %  | Height % |
|-------|-----------|---------|--------|---------|----------|
| 1     | 11.423    | 3115762 | 155856 | 52.294  | 61.601   |
| 2     | 17.116    | 2842384 | 97155  | 47.706  | 38.399   |
| Total |           | 5958146 | 253011 | 100.000 | 100.000  |

### Enantiomeric enriched 3ca

## ==== Shimadzu LCsolution Analysis Report ====

C:\Users\User\Desktop\LC data\Ren Qiao\rq736.lcd  
Acquired by : Admin  
Sample Name : RQE042  
Sample ID : RQ  
Data File Name : rq736.lcd  
Method File Name : 20%IPA, 1ml-min, 60min.lcm  
Batch File Name :  
Report File Name : Default.lcr  
Description : IC column ;20%IPA ;1ml/min

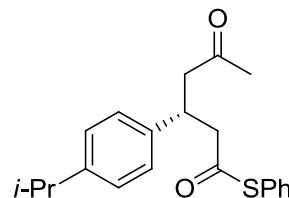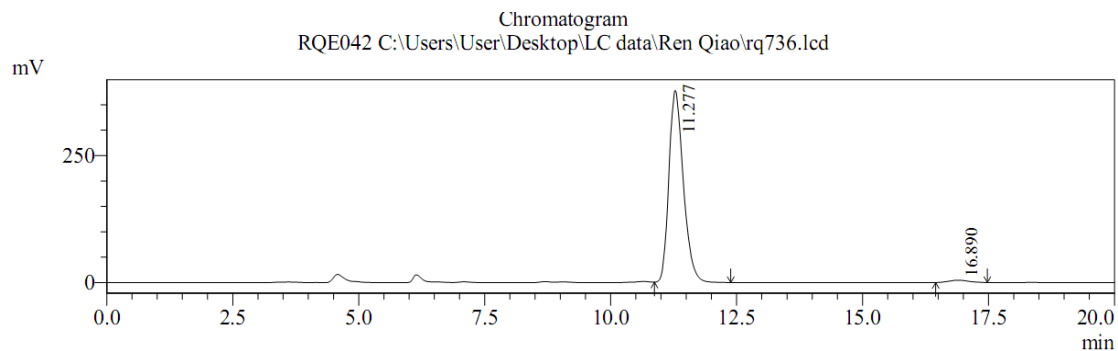

Detector A Ch1 254nm

| Peak# | Ret. Time | Area    | Height | Area %  | Height % |
|-------|-----------|---------|--------|---------|----------|
| 1     | 11.277    | 7514669 | 377523 | 98.368  | 98.799   |
| 2     | 16.890    | 124708  | 4589   | 1.632   | 1.201    |
| Total |           | 7639377 | 382112 | 100.000 | 100.000  |

**Racemic 3da**

**==== Shimadzu LCsolution Analysis Report ====**

C:\Users\User\Desktop\LC data\Ren Qiao\rq719.lcd  
 Acquired by : Admin  
 Sample Name : RQE035  
 Sample ID : RQ  
 Data File Name : rq719.lcd  
 Method File Name : 20%IPA, 1ml-min, 60min.lcm  
 Batch File Name :  
 Report File Name : Default.lcr  
 Description : IC column ;20%IPA ;1ml/min

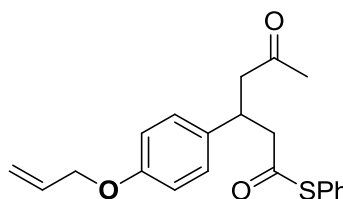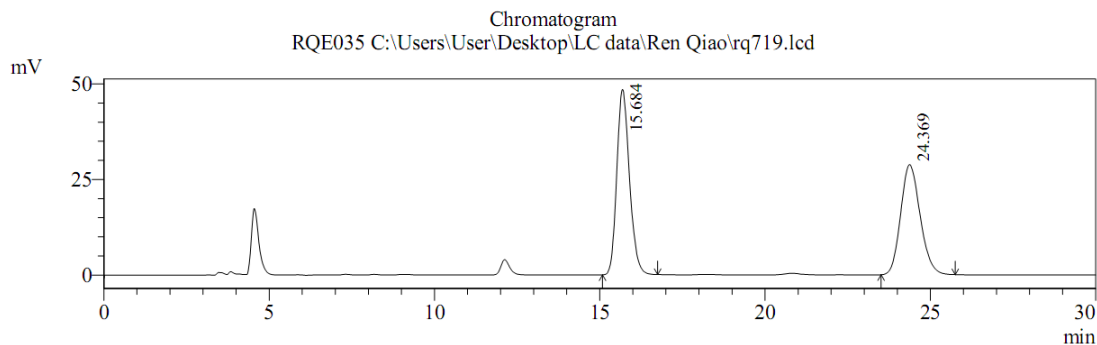

Detector A Ch1 254nm

| Peak# | Ret. Time | Area    | Height | Area %  | Height % |
|-------|-----------|---------|--------|---------|----------|
| 1     | 15.684    | 1291521 | 48446  | 52.284  | 62.706   |
| 2     | 24.369    | 1178670 | 28812  | 47.716  | 37.294   |
| Total |           | 2470191 | 77259  | 100.000 | 100.000  |

**Enantiomeric enriched 3da**

**==== Shimadzu LCsolution Analysis Report ====**

C:\Users\User\Desktop\LC data\Ren Qiao\rq729.lcd  
 Acquired by : Admin  
 Sample Name : RQE043  
 Sample ID : RQ  
 Data File Name : rq729.lcd  
 Method File Name : 20%IPA, 1ml-min, 60min.lcm  
 Batch File Name :  
 Report File Name : Default.lcr  
 Description : IC column ;20%IPA ;1ml/min

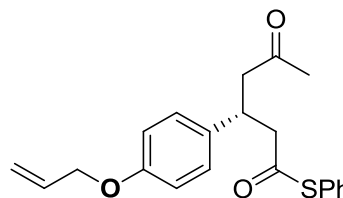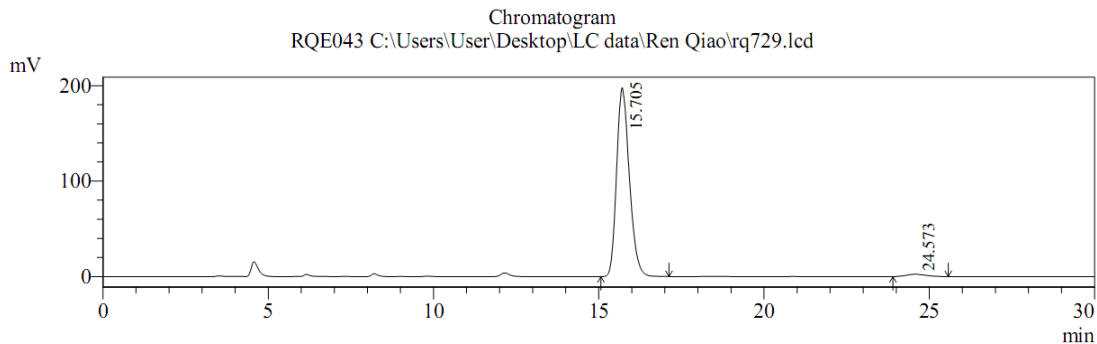

Detector A Ch1 254nm

| Peak# | Ret. Time | Area    | Height | Area %  | Height % |
|-------|-----------|---------|--------|---------|----------|
| 1     | 15.705    | 5328363 | 197841 | 98.141  | 98.793   |
| 2     | 24.573    | 100924  | 2417   | 1.859   | 1.207    |
| Total |           | 5429288 | 200258 | 100.000 | 100.000  |

Racemic 3ea

## ==== Shimadzu LCsolution Analysis Report ====

C:\Users\User\Desktop\LC data\Ren Qiao\rq720.lcd  
Acquired by : Admin  
Sample Name : RQE036  
Sample ID : RQ  
Data File Name : rq720.lcd  
Method File Name : 20%IPA, 1ml-min, 60min.lcm  
Batch File Name :  
Report File Name : Default.lcr  
Description : IC column ;20%IPA ;1ml/min

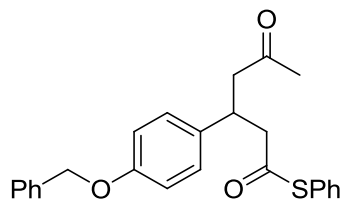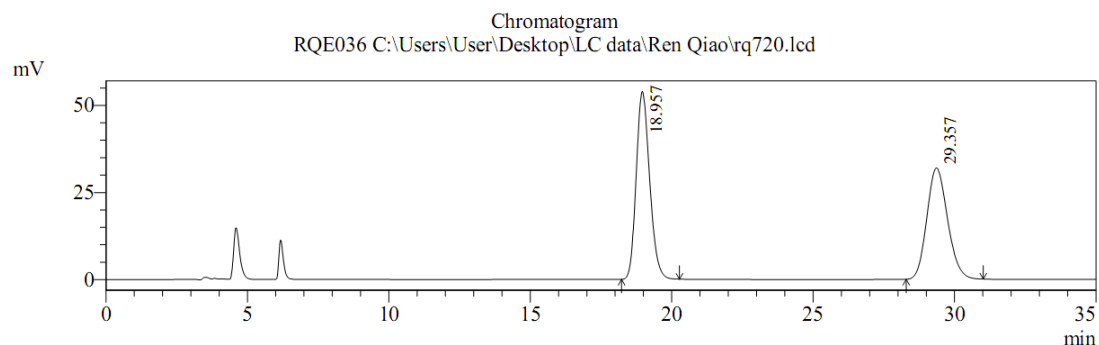

Detector A Ch1 254nm

| Peak# | Ret. Time | Area    | Height | Area %  | Height % |
|-------|-----------|---------|--------|---------|----------|
| 1     | 18.957    | 1784660 | 53936  | 52.329  | 62.797   |
| 2     | 29.357    | 1625798 | 31954  | 47.671  | 37.203   |
| Total |           | 3410458 | 85891  | 100.000 | 100.000  |

Enantiomeric enriched 3ea

## ==== Shimadzu LCsolution Analysis Report ====

C:\Users\User\Desktop\LC data\Ren Qiao\rq733.lcd  
Acquired by : Admin  
Sample Name : RQE044  
Sample ID : RQ  
Data File Name : rq733.lcd  
Method File Name : 20%IPA, 1ml-min, 60min.lcm  
Batch File Name :  
Report File Name : Default.lcr  
Description : IC column ;20%IPA ;1ml/min

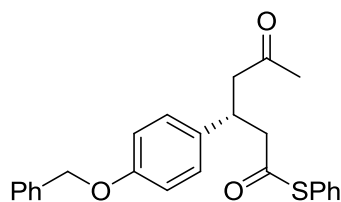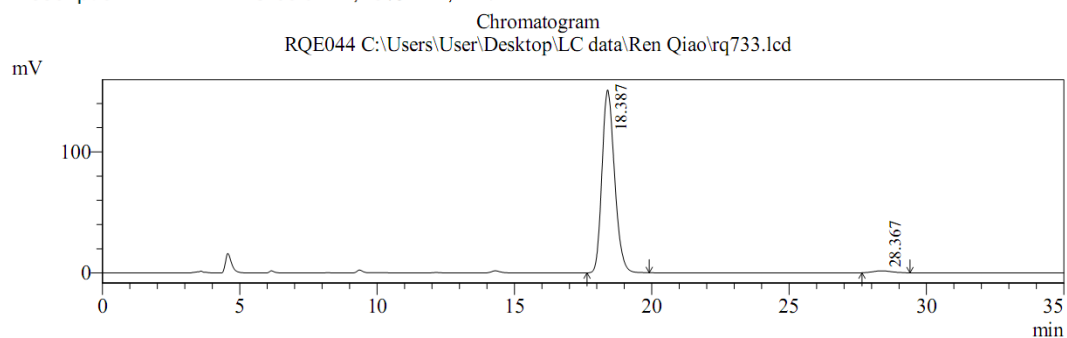

Detector A Ch1 254nm

| Peak# | Ret. Time | Area    | Height | Area %  | Height % |
|-------|-----------|---------|--------|---------|----------|
| 1     | 18.387    | 4818368 | 151211 | 98.435  | 98.920   |
| 2     | 28.367    | 76629   | 1650   | 1.565   | 1.080    |
| Total |           | 4894997 | 152862 | 100.000 | 100.000  |

### Racemic 3fa

## ==== Shimadzu LCsolution Analysis Report ====

C:\Users\User\Desktop\LC data\Ren Qiao\rq724.lcd  
Acquired by : Admin  
Sample Name : RQE038  
Sample ID : RQ  
Data File Name : rq724.lcd  
Method File Name : 20%IPA, 1ml-min, 60min.lcm  
Batch File Name :  
Report File Name : Default.lcr  
Description : IC column ;20%IPA ;1ml/min

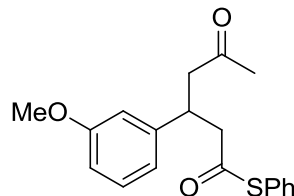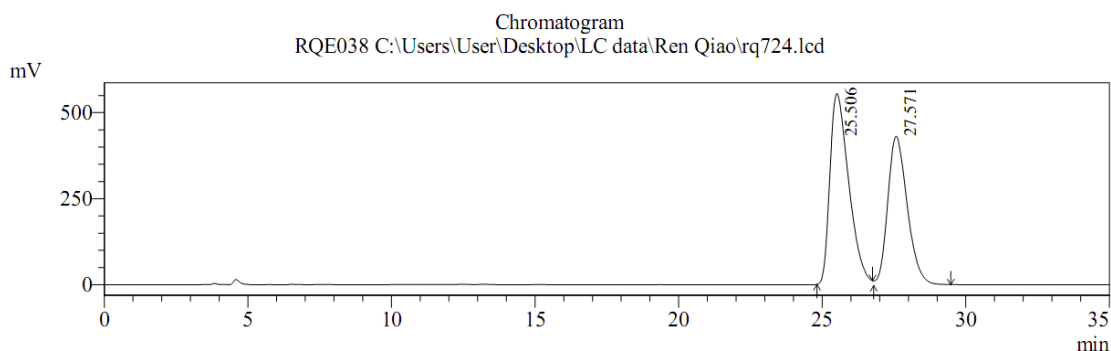

Detector A Ch1 254nm

| Peak# | Ret. Time | Area     | Height | Area %  | Height % |
|-------|-----------|----------|--------|---------|----------|
| 1     | 25.506    | 24735686 | 551014 | 54.506  | 55.996   |
| 2     | 27.571    | 20645943 | 433003 | 45.494  | 44.004   |
| Total |           | 45381629 | 984016 | 100.000 | 100.000  |

### Enantiomeric enriched 3fa

## ==== Shimadzu LCsolution Analysis Report ====

C:\Users\User\Desktop\LC data\Ren Qiao\rq735.lcd  
Acquired by : Admin  
Sample Name : RQE046  
Sample ID : RQ  
Data File Name : rq735.lcd  
Method File Name : 20%IPA, 1ml-min, 60min.lcm  
Batch File Name :  
Report File Name : Default.lcr  
Description : IC column ;20%IPA ;1ml/min

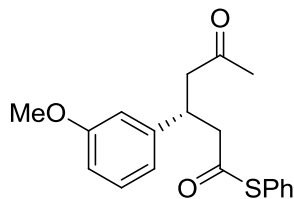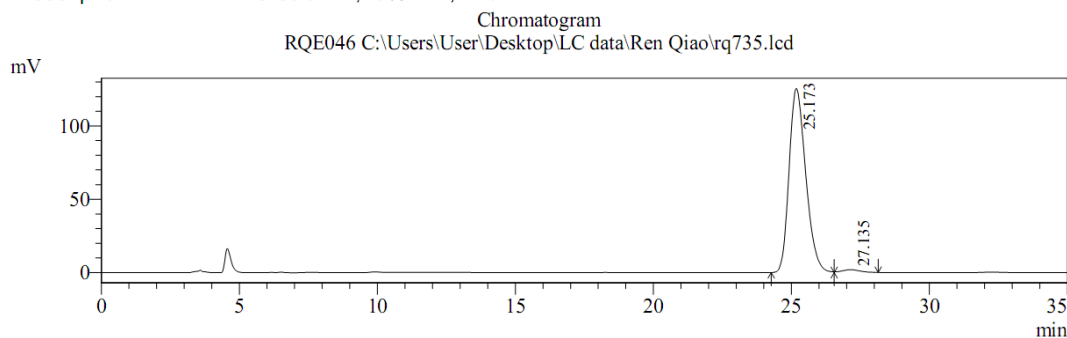

Detector A Ch1 254nm

| Peak# | Ret. Time | Area    | Height | Area %  | Height % |
|-------|-----------|---------|--------|---------|----------|
| 1     | 25.173    | 5270470 | 125457 | 98.400  | 98.502   |
| 2     | 27.135    | 85700   | 1908   | 1.600   | 1.498    |
| Total |           | 5356171 | 127364 | 100.000 | 100.000  |

### Racemic 3ga

## ==== Shimadzu LCsolution Analysis Report ====

C:\Users\User\Desktop\LC data\Ren Qiao\rq691.lcd  
Acquired by : Admin  
Sample Name : RQD297  
Sample ID : RQ  
Data File Name : rq691.lcd  
Method File Name : 20%IPA, 1ml-min, 60min.lcm  
Batch File Name :  
Report File Name : Default.lcr  
Description : IC column ;20%IPA ;1ml/min

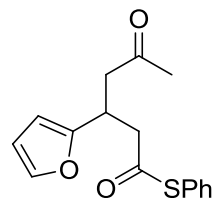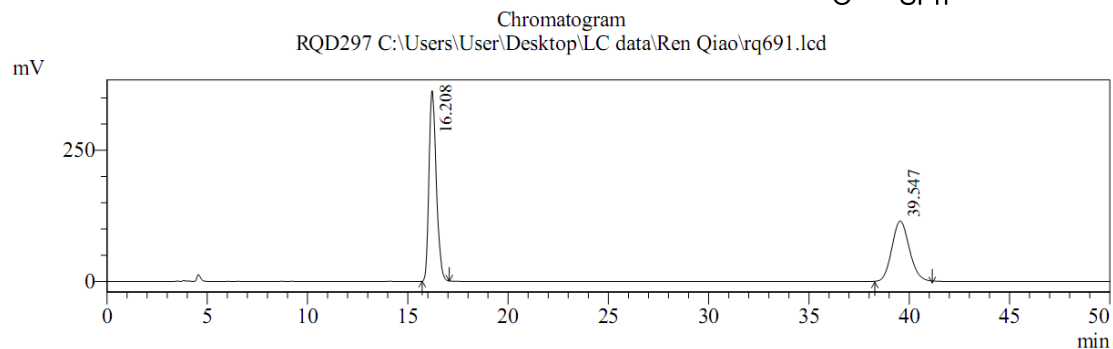

Detector A Ch1 254nm

| Peak# | Ret. Time | Area     | Height | Area %  | Height % |
|-------|-----------|----------|--------|---------|----------|
| 1     | 16.208    | 9222153  | 363123 | 55.596  | 75.624   |
| 2     | 39.547    | 7365720  | 117047 | 44.404  | 24.376   |
| Total |           | 16587873 | 480170 | 100.000 | 100.000  |

### Enantiomeric enriched 3ga

## ==== Shimadzu LCsolution Analysis Report ====

C:\Users\User\Desktop\LC data\Ren Qiao\rq694.lcd  
Acquired by : Admin  
Sample Name : RQD300  
Sample ID : RQ  
Data File Name : rq694.lcd  
Method File Name : 20%IPA, 1ml-min, 60min.lcm  
Batch File Name :  
Report File Name : Default.lcr  
Description : IC column ;20%IPA ;1ml/min

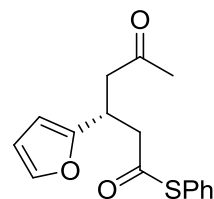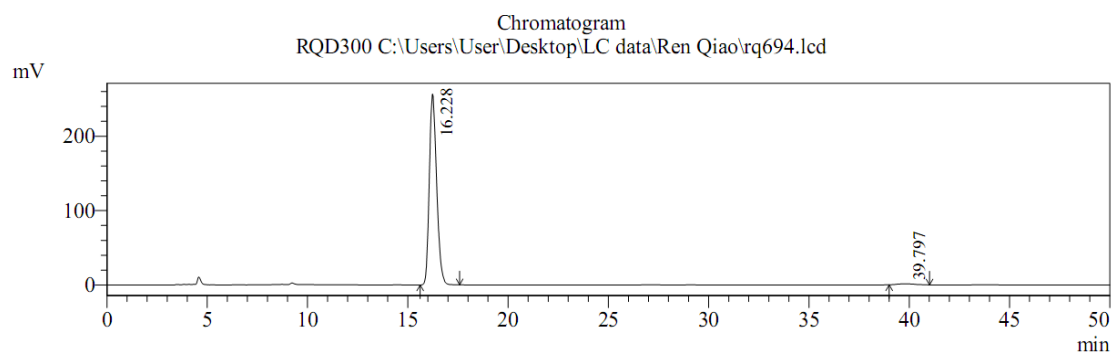

Detector A Ch1 254nm

| Peak# | Ret. Time | Area    | Height | Area %  | Height % |
|-------|-----------|---------|--------|---------|----------|
| 1     | 16.228    | 6515593 | 256557 | 98.830  | 99.467   |
| 2     | 39.797    | 77121   | 1376   | 1.170   | 0.533    |
| Total |           | 6592714 | 257933 | 100.000 | 100.000  |

### Racemic 3ha

## ==== Shimadzu LCsolution Analysis Report ====

C:\Users\User\Desktop\LC data\Ren Qiao\rq692.lcd  
Acquired by : Admin  
Sample Name : RQD298  
Sample ID : RQ  
Data File Name : rq692.lcd  
Method File Name : 20%IPA, 1ml-min, 60min.lcm  
Batch File Name :  
Report File Name : Default.lcr  
Description : IC column ;20%IPA ;1ml/min

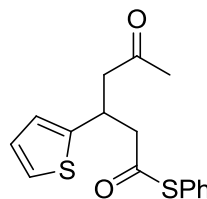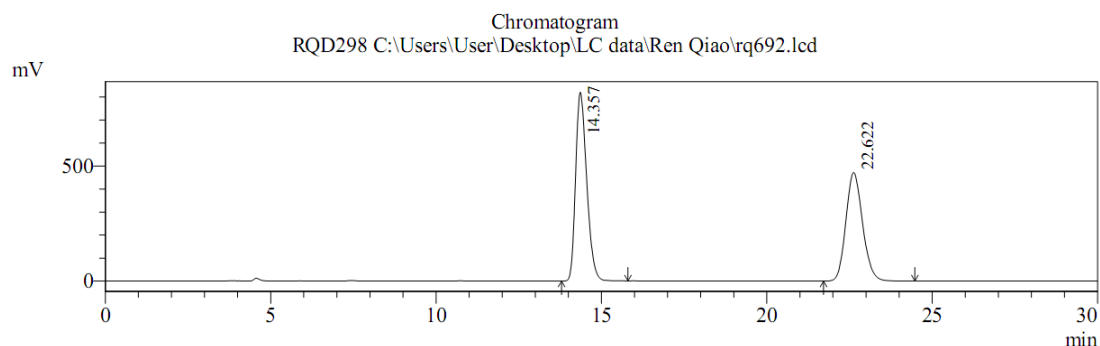

Detector A Ch1 254nm

| Peak# | Ret. Time | Area     | Height  | Area %  | Height % |
|-------|-----------|----------|---------|---------|----------|
| 1     | 14.357    | 19099495 | 821168  | 53.658  | 63.520   |
| 2     | 22.622    | 16495351 | 471599  | 46.342  | 36.480   |
| Total |           | 35594847 | 1292767 | 100.000 | 100.000  |

### Enantiomeric enriched 3ha

## ==== Shimadzu LCsolution Analysis Report ====

C:\Users\User\Desktop\LC data\Ren Qiao\rq695.lcd  
Acquired by : Admin  
Sample Name : RQE001  
Sample ID : RQ  
Data File Name : rq695.lcd  
Method File Name : 20%IPA, 1ml-min, 60min.lcm  
Batch File Name :  
Report File Name : Default.lcr  
Description : IC column ;20%IPA ;1ml/min

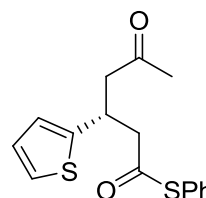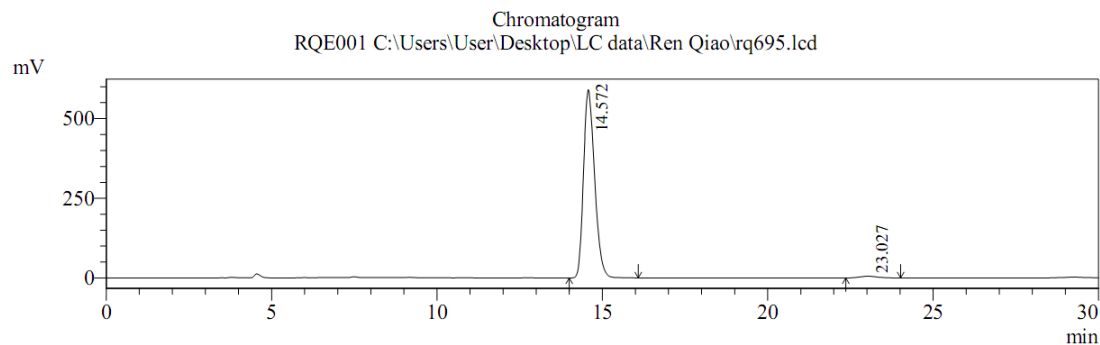

Detector A Ch1 254nm

| Peak# | Ret. Time | Area     | Height | Area %  | Height % |
|-------|-----------|----------|--------|---------|----------|
| 1     | 14.572    | 13742729 | 590527 | 98.588  | 99.056   |
| 2     | 23.027    | 196854   | 5626   | 1.412   | 0.944    |
| Total |           | 13939583 | 596153 | 100.000 | 100.000  |



### Racemic 3ia

## ==== Shimadzu LCsolution Analysis Report ====

C:\Users\User\Desktop\LC data\Ren Qiao\rq701.lcd  
Acquired by : Admin  
Sample Name : RQE004  
Sample ID : RQ  
Data File Name : rq701.lcd  
Method File Name : 10%IPA, 1ml-min, 60min.lcm  
Batch File Name :  
Report File Name : Default.lcr  
Description : ID column ; 10%IPA ; 1ml/min

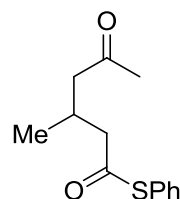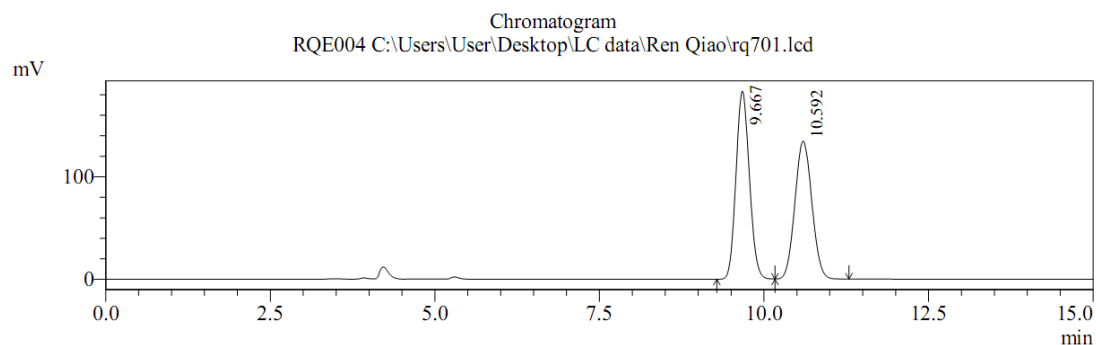

Detector A Ch1 254nm

| Peak# | Ret. Time | Area    | Height | Area %  | Height % |
|-------|-----------|---------|--------|---------|----------|
| 1     | 9.667     | 2594168 | 183166 | 51.751  | 57.642   |
| 2     | 10.592    | 2418598 | 134597 | 48.249  | 42.358   |
| Total |           | 5012767 | 317764 | 100.000 | 100.000  |

### Enantiomeric enriched 3ia

## ==== Shimadzu LCsolution Analysis Report ====

C:\Users\User\Desktop\LC data\Ren Qiao\rq702.lcd  
Acquired by : Admin  
Sample Name : RQE007  
Sample ID : RQ  
Data File Name : rq702.lcd  
Method File Name : 10%IPA, 1ml-min, 60min.lcm  
Batch File Name :  
Report File Name : Default.lcr  
Description : ID column ; 10%IPA ; 1ml/min

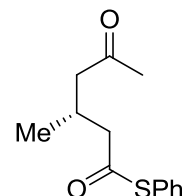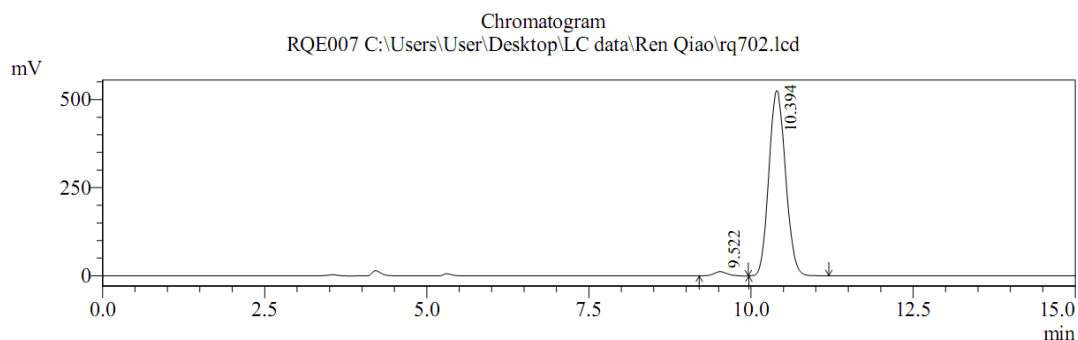

Detector A Ch1 254nm

| Peak# | Ret. Time | Area    | Height | Area %  | Height % |
|-------|-----------|---------|--------|---------|----------|
| 1     | 9.522     | 165012  | 12028  | 1.728   | 2.237    |
| 2     | 10.394    | 9383898 | 525632 | 98.272  | 97.763   |
| Total |           | 9548911 | 537660 | 100.000 | 100.000  |

### Racemic 3ja

## ==== Shimadzu LCsolution Analysis Report ====

C:\Users\User\Desktop\LC data\Ren Qiao\rq697.lcd  
Acquired by : Admin  
Sample Name : RQE002  
Sample ID : RQ  
Data File Name : rq697.lcd  
Method File Name : 20%IPA, 1ml-min, 60min.lcm  
Batch File Name :  
Report File Name : Default.lcr  
Description : IC column ;20%IPA ;1ml/min

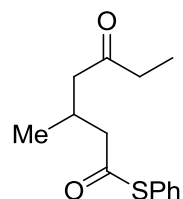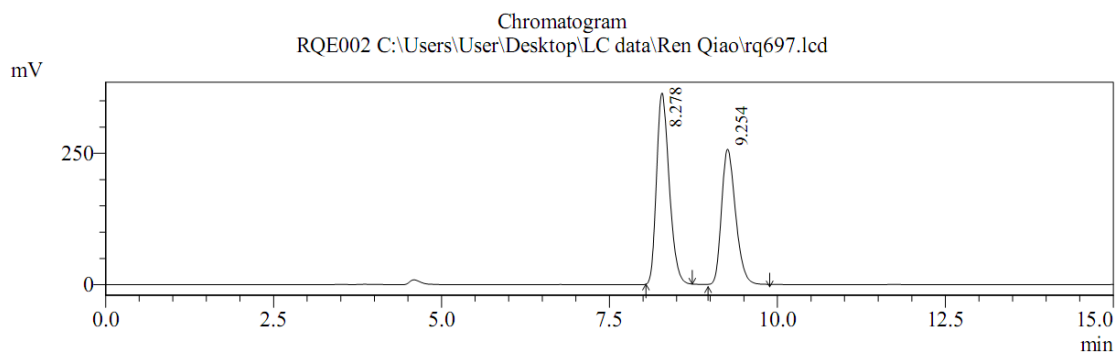

Detector A Ch1 254nm

| Peak# | Ret. Time | Area    | Height | Area %  | Height % |
|-------|-----------|---------|--------|---------|----------|
| 1     | 8.278     | 4776181 | 364045 | 54.487  | 58.130   |
| 2     | 9.254     | 3989620 | 262219 | 45.513  | 41.870   |
| Total |           | 8765801 | 626264 | 100.000 | 100.000  |

### Enantiomeric enriched 3ja

## ==== Shimadzu LCsolution Analysis Report ====

C:\Users\User\Desktop\LC data\Ren Qiao\rq703.lcd  
Acquired by : Admin  
Sample Name : RQE005  
Sample ID : RQ  
Data File Name : rq703.lcd  
Method File Name : 20%IPA, 1ml-min, 60min.lcm  
Batch File Name :  
Report File Name : Default.lcr  
Description : IC column ;20%IPA ;1ml/min

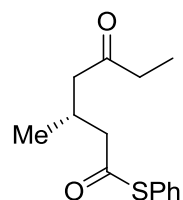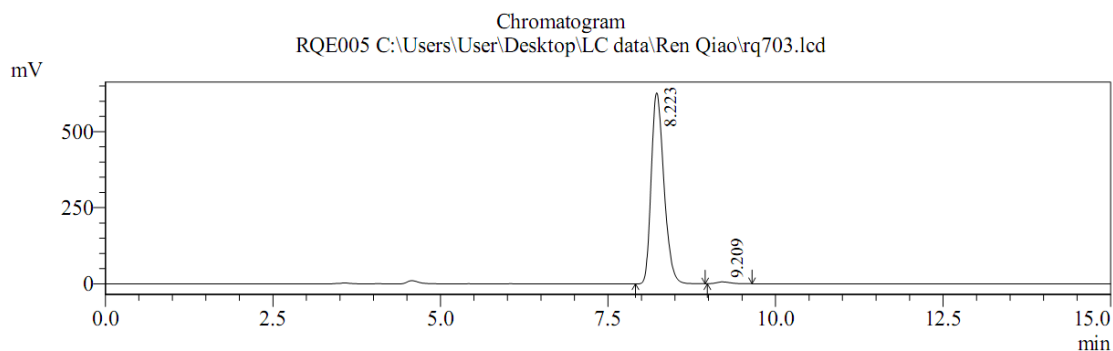

Detector A Ch1 254nm

| Peak# | Ret. Time | Area    | Height | Area %  | Height % |
|-------|-----------|---------|--------|---------|----------|
| 1     | 8.223     | 8286437 | 627879 | 98.955  | 99.007   |
| 2     | 9.209     | 87485   | 6299   | 1.045   | 0.993    |
| Total |           | 8373922 | 634178 | 100.000 | 100.000  |

### Racemic 3ab

## ==== Shimadzu LCsolution Analysis Report ====

C:\Users\User\Desktop\LC data\Ren Qiao\rq704.lcd  
Acquired by : Admin  
Sample Name : RQE008  
Sample ID : RQ  
Data File Name : rq704.lcd  
Method File Name : 20%IPA, 1ml-min, 60min.lcm  
Batch File Name :  
Report File Name : Default.lcr  
Description : IC column ;20%IPA ;1ml/min

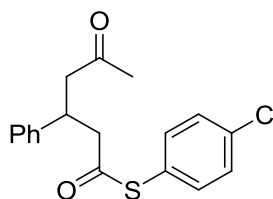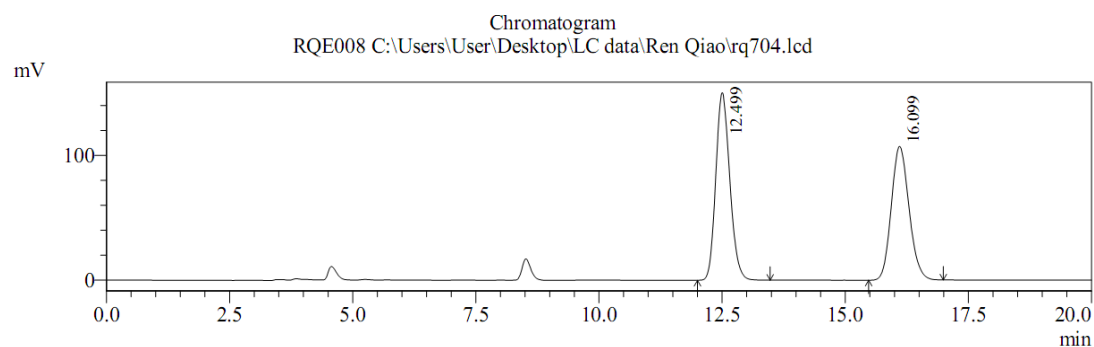

Detector A Ch1 254nm

| Peak# | Ret. Time | Area    | Height | Area %  | Height % |
|-------|-----------|---------|--------|---------|----------|
| 1     | 12.499    | 2985206 | 150425 | 52.662  | 58.372   |
| 2     | 16.099    | 2683446 | 107273 | 47.338  | 41.628   |
| Total |           | 5668652 | 257698 | 100.000 | 100.000  |

### Enantiomeric enriched 3ab

## ==== Shimadzu LCsolution Analysis Report ====

C:\Users\User\Desktop\LC data\Ren Qiao\rq708.lcd  
Acquired by : Admin  
Sample Name : RQE009  
Sample ID : RQ  
Data File Name : rq708.lcd  
Method File Name : 20%IPA, 1ml-min, 60min.lcm  
Batch File Name :  
Report File Name : Default.lcr  
Description : IC column ;20%IPA ;1ml/min

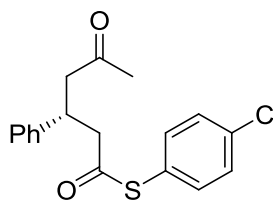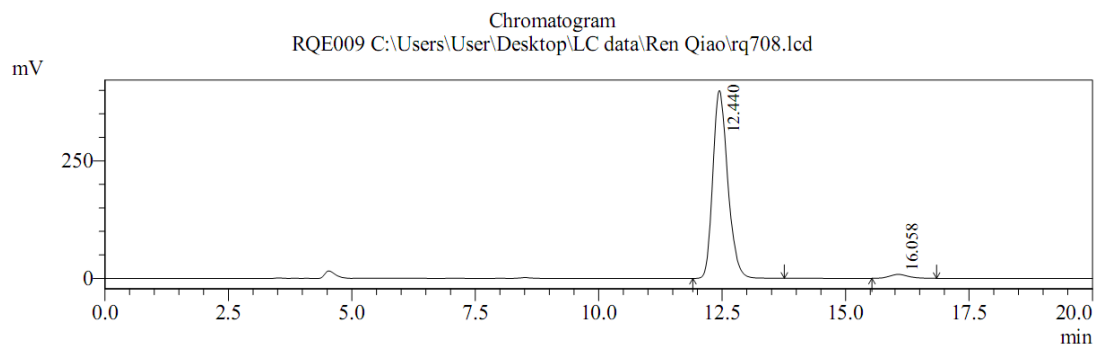

Detector A Ch1 254nm

| Peak# | Ret. Time | Area    | Height | Area %  | Height % |
|-------|-----------|---------|--------|---------|----------|
| 1     | 12.440    | 8379533 | 399331 | 97.486  | 97.952   |
| 2     | 16.058    | 216110  | 8350   | 2.514   | 2.048    |
| Total |           | 8595642 | 407681 | 100.000 | 100.000  |

Racemic 3ac

==== Shimadzu LCsolution Analysis Report ====

C:\Users\User\Desktop\LC data\Ren Qiao\rq706.lcd  
 Acquired by : Admin  
 Sample Name : RQE010  
 Sample ID : RQ  
 Data File Name : rq706.lcd  
 Method File Name : 20%IPA, 1ml-min, 60min.lcm  
 Batch File Name :  
 Report File Name : Default.lcr  
 Description : ID column ;20%IPA ;1ml/min

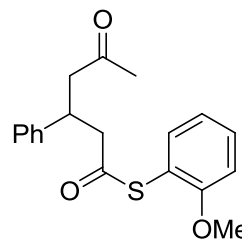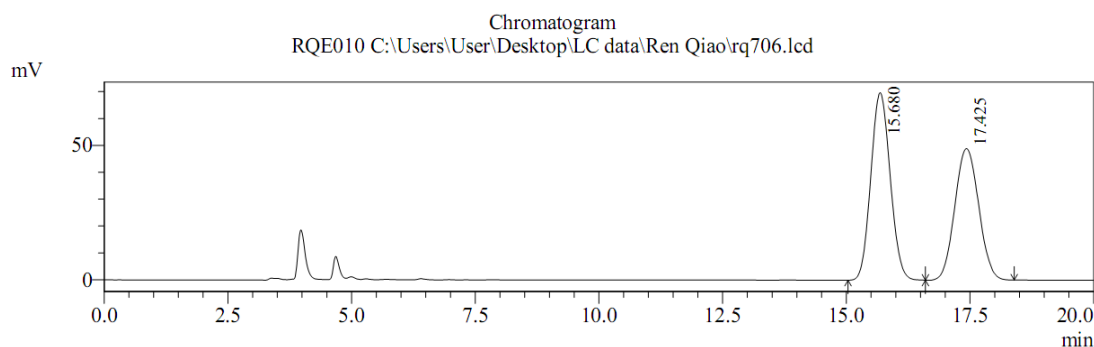

Detector A Ch1 254nm

| Peak# | Ret. Time | Area    | Height | Area %  | Height % |
|-------|-----------|---------|--------|---------|----------|
| 1     | 15.680    | 1895216 | 69771  | 53.573  | 58.773   |
| 2     | 17.425    | 1642440 | 48942  | 46.427  | 41.227   |
| Total |           | 3537656 | 118713 | 100.000 | 100.000  |

Enantiomeric enriched 3ac

==== Shimadzu LCsolution Analysis Report ====

C:\Users\User\Desktop\LC data\Ren Qiao\rq707.lcd  
 Acquired by : Admin  
 Sample Name : RQE011  
 Sample ID : RQ  
 Data File Name : rq707.lcd  
 Method File Name : 20%IPA, 1ml-min, 60min.lcm  
 Batch File Name :  
 Report File Name : Default.lcr  
 Description : ID column ;20%IPA ;1ml/min

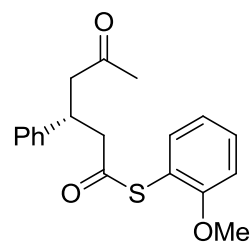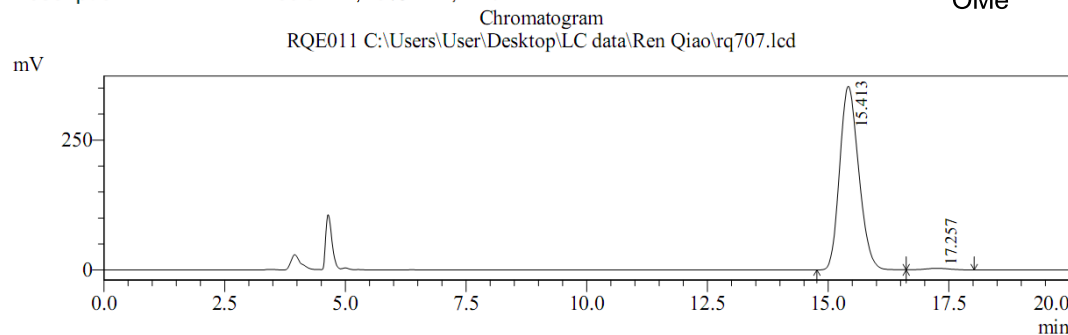

Detector A Ch1 254nm

| Peak# | Ret. Time | Area    | Height | Area %  | Height % |
|-------|-----------|---------|--------|---------|----------|
| 1     | 15.413    | 9695470 | 353306 | 98.910  | 99.114   |
| 2     | 17.257    | 106874  | 3159   | 1.090   | 0.886    |
| Total |           | 9802344 | 356465 | 100.000 | 100.000  |

### Racemic 3ad

## ==== Shimadzu LCsolution Analysis Report ====

C:\Users\User\Desktop\LC data\Ren Qiao\rq713.lcd  
Acquired by : Admin  
Sample Name : RQE012  
Sample ID : RQ  
Data File Name : rq713.lcd  
Method File Name : 10%IPA, 1ml-min, 60min.lcm  
Batch File Name :  
Report File Name : Default.lcr  
Description : IA column ;10%IPA ;1ml/min

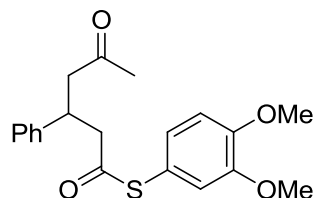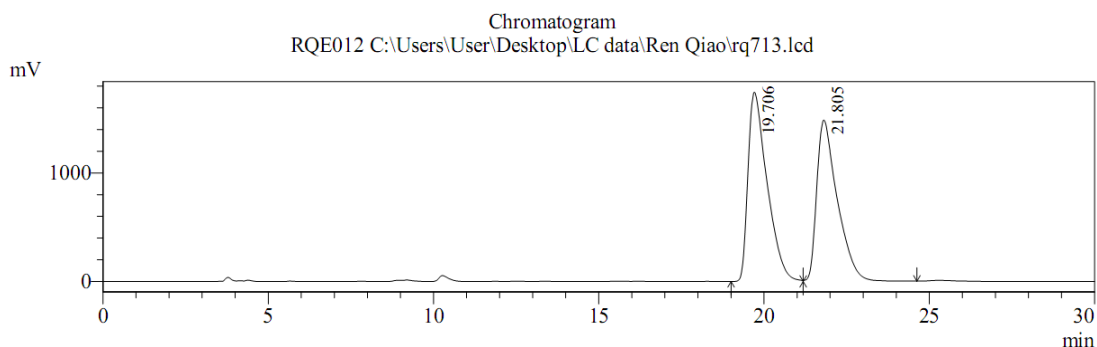

Detector A Ch1 254nm

| Peak# | Ret. Time | Area      | Height  | Area %  | Height % |
|-------|-----------|-----------|---------|---------|----------|
| 1     | 19.706    | 70072823  | 1742886 | 52.193  | 53.982   |
| 2     | 21.805    | 64184918  | 1485768 | 47.807  | 46.018   |
| Total |           | 134257741 | 3228655 | 100.000 | 100.000  |

### Enantiomeric enriched 3ad

## ==== Shimadzu LCsolution Analysis Report ====

C:\Users\User\Desktop\LC data\Ren Qiao\rq714.lcd  
Acquired by : Admin  
Sample Name : RQE013  
Sample ID : RQ  
Data File Name : rq714.lcd  
Method File Name : 10%IPA, 1ml-min, 60min.lcm  
Batch File Name :  
Report File Name : Default.lcr  
Description : IA column ;10%IPA ;1ml/min

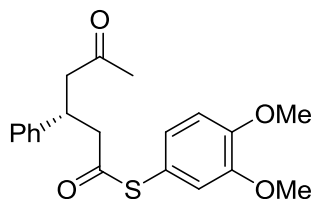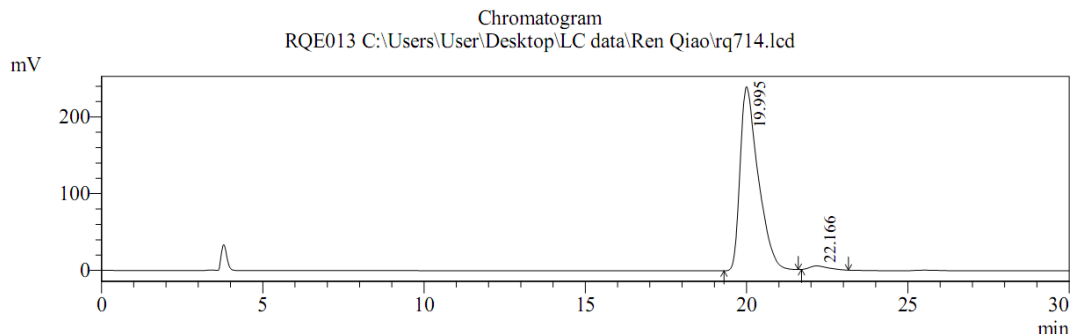

Detector A Ch1 254nm

| Peak# | Ret. Time | Area    | Height | Area %  | Height % |
|-------|-----------|---------|--------|---------|----------|
| 1     | 19.995    | 9306096 | 239413 | 97.986  | 97.981   |
| 2     | 22.166    | 191299  | 4933   | 2.014   | 2.019    |
| Total |           | 9497396 | 244347 | 100.000 | 100.000  |

### Racemic 3ka

## ==== Shimadzu LCsolution Analysis Report ====

C:\Users\User\Desktop\LC data\Ren Qiao\rq727.lcd  
Acquired by : Admin  
Sample Name : RQE031  
Sample ID : RQ  
Data File Name : rq727.lcd  
Method File Name : 20%IPA, 1ml-min, 60min.lcm  
Batch File Name :  
Report File Name : Default.lcr  
Description : IC column ;20%IPA ;1ml/min

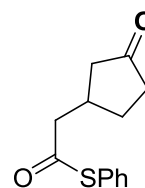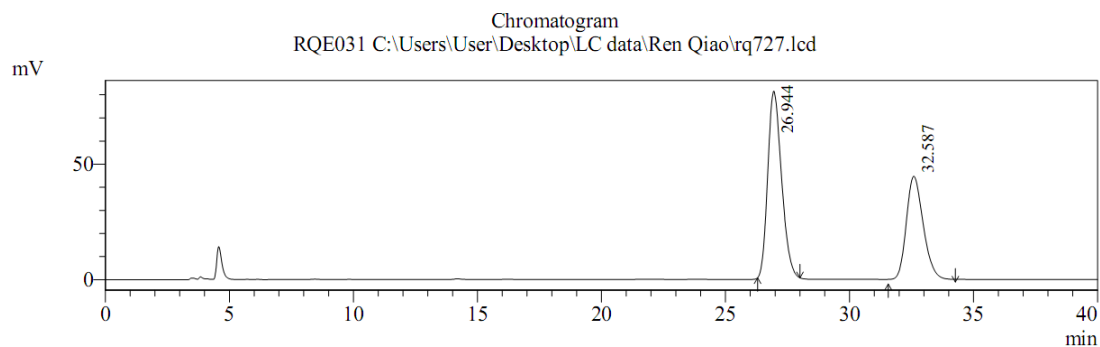

Detector A Ch1 254nm

| Peak# | Ret. Time | Area    | Height | Area %  | Height % |
|-------|-----------|---------|--------|---------|----------|
| 1     | 26.944    | 3112751 | 80811  | 56.847  | 63.553   |
| 2     | 32.587    | 2362930 | 46344  | 43.153  | 36.447   |
| Total |           | 5475681 | 127155 | 100.000 | 100.000  |

### Enantiomeric enriched 3ka

## ==== Shimadzu LCsolution Analysis Report ====

C:\Users\User\Desktop\LC data\Ren Qiao\rq731.lcd  
Acquired by : Admin  
Sample Name : RQE048  
Sample ID : RQ  
Data File Name : rq731.lcd  
Method File Name : 20%IPA, 1ml-min, 60min.lcm  
Batch File Name :  
Report File Name : Default.lcr  
Description : IC column ;20%IPA ;1ml/min

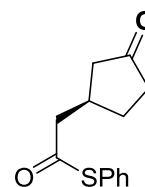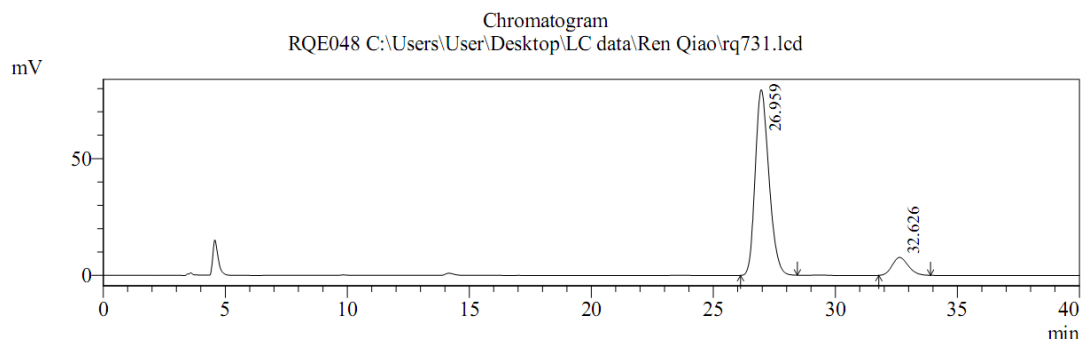

Detector A Ch1 254nm

| Peak# | Ret. Time | Area    | Height | Area %  | Height % |
|-------|-----------|---------|--------|---------|----------|
| 1     | 26.959    | 3107383 | 79459  | 89.822  | 91.199   |
| 2     | 32.626    | 352125  | 7668   | 10.178  | 8.801    |
| Total |           | 3459508 | 87126  | 100.000 | 100.000  |
